# Supplementary material for: Celiac Disease Image Classification using Convolutional Neural Network
Source: Preprints.org preprint supplement (doi:10.20944/preprints202407.0329.v1), 2024-07-03
Supplement: Supplementary file 1 [file supplementary]

## Sheet: 3 class scores
scores =
4980×3 single matrix
0.9972 0.0005 0.0023
0.9998 0.0000 0.0002
1.0000 0.0000 0.0000
1.0000 0.0000 0.0000
1.0000 0.0000 0.0000
0.9891 0.0008 0.0101
0.9994 0.0005 0.0001
1.0000 0.0000 0.0000
1.0000 0.0000 0.0000
1.0000 0.0000 0.0000
1.0000 0.0000 0.0000
0.9991 0.0004 0.0005
0.9999 0.0000 0.0001
0.9973 0.0008 0.0020
1.0000 0.0000 0.0000
0.9884 0.0002 0.0114
0.9998 0.0001 0.0001
1.0000 0.0000 0.0000
0.9999 0.0000 0.0001
0.9999 0.0000 0.0001
0.9997 0.0002 0.0001
0.9415 0.0535 0.0050
0.9997 0.0000 0.0003
0.9994 0.0001 0.0005
0.9988 0.0004 0.0009
0.9980 0.0000 0.0020
0.9998 0.0000 0.0002
1.0000 0.0000 0.0000
0.9993 0.0000 0.0007
0.9998 0.0000 0.0002
0.9999 0.0000 0.0001
1.0000 0.0000 0.0000
0.9931 0.0002 0.0067
0.9998 0.0000 0.0002
1.0000 0.0000 0.0000
0.9991 0.0009 0.0000
0.9965 0.0001 0.0035
1.0000 0.0000 0.0000
0.9991 0.0002 0.0007
1.0000 0.0000 0.0000
0.9999 0.0000 0.0001
1.0000 0.0000 0.0000
1.0000 0.0000 0.0000
0.9999 0.0000 0.0001
1.0000 0.0000 0.0000
0.9989 0.0002 0.0009
1.0000 0.0000 0.0000
0.9999 0.0001 0.0000
0.9856 0.0072 0.0072
0.9999 0.0000 0.0000
1.0000 0.0000 0.0000
1.0000 0.0000 0.0000
1.0000 0.0000 0.0000
0.9804 0.0160 0.0036
0.9998 0.0002 0.0000
1.0000 0.0000 0.0000
0.9998 0.0001 0.0001
1.0000 0.0000 0.0000
1.0000 0.0000 0.0000
1.0000 0.0000 0.0000
0.9998 0.0001 0.0000
0.9985 0.0011 0.0003
0.9979 0.0018 0.0003
1.0000 0.0000 0.0000
0.9980 0.0018 0.0002
0.5890 0.4037 0.0073
0.9661 0.0286 0.0052
1.0000 0.0000 0.0000
0.9997 0.0000 0.0003
0.9969 0.0000 0.0031
0.9920 0.0001 0.0078
0.9999 0.0000 0.0001
0.9996 0.0003 0.0001
0.9999 0.0000 0.0000
1.0000 0.0000 0.0000
0.9999 0.0000 0.0001
0.9971 0.0013 0.0016
0.9998 0.0000 0.0002
0.9998 0.0001 0.0000
0.9999 0.0001 0.0000
0.9952 0.0036 0.0011
0.9980 0.0004 0.0016
0.9999 0.0000 0.0001
0.9999 0.0001 0.0000
0.9992 0.0008 0.0000
0.9994 0.0005 0.0001
1.0000 0.0000 0.0000
0.9941 0.0000 0.0059
0.9969 0.0021 0.0010
1.0000 0.0000 0.0000
1.0000 0.0000 0.0000
0.9990 0.0001 0.0009
1.0000 0.0000 0.0000
0.9984 0.0014 0.0002
1.0000 0.0000 0.0000
0.9999 0.0000 0.0001
0.9999 0.0001 0.0000
0.9909 0.0088 0.0003
0.9984 0.0001 0.0016
0.9932 0.0032 0.0036
0.9988 0.0012 0.0000
0.9962 0.0036 0.0002
0.9999 0.0000 0.0001
0.9990 0.0007 0.0003
0.9992 0.0003 0.0005
1.0000 0.0000 0.0000
0.9979 0.0021 0.0000
1.0000 0.0000 0.0000
0.9996 0.0003 0.0001
0.9993 0.0007 0.0000
0.9999 0.0000 0.0001
0.9963 0.0013 0.0024
0.9998 0.0002 0.0000
0.9773 0.0199 0.0029
0.9979 0.0021 0.0000
0.5410 0.4034 0.0556
0.9688 0.0311 0.0001
0.9999 0.0001 0.0000
0.9996 0.0004 0.0000
0.9997 0.0003 0.0000
1.0000 0.0000 0.0000
0.9949 0.0050 0.0000
0.9948 0.0049 0.0003
0.9995 0.0005 0.0000
0.9990 0.0010 0.0000
1.0000 0.0000 0.0000
1.0000 0.0000 0.0000
0.9980 0.0003 0.0017
0.9999 0.0001 0.0000
1.0000 0.0000 0.0000
1.0000 0.0000 0.0000
1.0000 0.0000 0.0000
0.9994 0.0005 0.0000
0.9999 0.0001 0.0000
1.0000 0.0000 0.0000
0.9960 0.0001 0.0039
1.0000 0.0000 0.0000
0.9995 0.0000 0.0005
0.9998 0.0000 0.0002
1.0000 0.0000 0.0000
0.9998 0.0001 0.0001
1.0000 0.0000 0.0000
0.9997 0.0002 0.0001
0.9991 0.0000 0.0009
1.0000 0.0000 0.0000
0.9991 0.0000 0.0009
1.0000 0.0000 0.0000
1.0000 0.0000 0.0000
0.9999 0.0000 0.0001
0.9995 0.0005 0.0000
1.0000 0.0000 0.0000
0.9359 0.0641 0.0000
0.9999 0.0001 0.0000
0.9945 0.0040 0.0015
0.9988 0.0012 0.0000
0.9998 0.0001 0.0000
0.9999 0.0001 0.0000
1.0000 0.0000 0.0000
0.9994 0.0006 0.0000
1.0000 0.0000 0.0000
0.9860 0.0128 0.0012
1.0000 0.0000 0.0000
0.9935 0.0063 0.0002
0.9967 0.0011 0.0022
1.0000 0.0000 0.0000
0.9998 0.0002 0.0001
0.9957 0.0040 0.0002
0.9910 0.0052 0.0038
0.9999 0.0000 0.0000
0.9986 0.0007 0.0007
0.9998 0.0002 0.0000
0.9999 0.0000 0.0000
1.0000 0.0000 0.0000
0.9298 0.0039 0.0663
0.9064 0.0165 0.0771
0.9999 0.0000 0.0001
1.0000 0.0000 0.0000
0.9999 0.0001 0.0001
0.9999 0.0001 0.0000
1.0000 0.0000 0.0000
1.0000 0.0000 0.0000
0.9996 0.0004 0.0000
1.0000 0.0000 0.0000
0.9978 0.0016 0.0005
0.9971 0.0028 0.0001
0.9983 0.0016 0.0000
0.9998 0.0002 0.0000
0.9974 0.0023 0.0003
0.9999 0.0000 0.0001
0.8847 0.1087 0.0066
1.0000 0.0000 0.0000
0.9990 0.0001 0.0009
0.9998 0.0002 0.0000
1.0000 0.0000 0.0000
0.9981 0.0000 0.0019
0.9996 0.0000 0.0004
0.9995 0.0000 0.0005
0.9990 0.0003 0.0006
0.9999 0.0000 0.0000
1.0000 0.0000 0.0000
0.9986 0.0000 0.0013
0.9990 0.0009 0.0001
0.9940 0.0038 0.0022
1.0000 0.0000 0.0000
0.9985 0.0015 0.0000
1.0000 0.0000 0.0000
0.9999 0.0001 0.0001
0.9982 0.0007 0.0012
0.9999 0.0001 0.0000
0.9975 0.0009 0.0016
0.8960 0.0056 0.0984
0.9990 0.0001 0.0010
1.0000 0.0000 0.0000
1.0000 0.0000 0.0000
0.9992 0.0000 0.0007
1.0000 0.0000 0.0000
0.9999 0.0001 0.0000
0.9992 0.0000 0.0008
0.9999 0.0000 0.0001
0.9994 0.0000 0.0006
0.9996 0.0000 0.0003
0.9994 0.0000 0.0005
1.0000 0.0000 0.0000
1.0000 0.0000 0.0000
0.9999 0.0000 0.0000
0.9999 0.0001 0.0000
0.9947 0.0000 0.0053
1.0000 0.0000 0.0000
0.9995 0.0000 0.0005
1.0000 0.0000 0.0000
0.9999 0.0000 0.0001
0.8170 0.0559 0.1271
0.9967 0.0000 0.0032
0.9994 0.0002 0.0004
0.9997 0.0000 0.0003
0.9999 0.0000 0.0001
0.9999 0.0000 0.0001
0.9999 0.0000 0.0001
0.9999 0.0000 0.0001
1.0000 0.0000 0.0000
0.9999 0.0000 0.0001
0.9990 0.0000 0.0010
0.9996 0.0000 0.0004
0.9997 0.0001 0.0002
0.9994 0.0000 0.0006
1.0000 0.0000 0.0000
0.9995 0.0001 0.0004
0.9996 0.0000 0.0004
0.9997 0.0000 0.0003
1.0000 0.0000 0.0000
0.9996 0.0001 0.0003
0.9998 0.0000 0.0002
0.9997 0.0001 0.0002
1.0000 0.0000 0.0000
0.9931 0.0030 0.0039
0.9984 0.0001 0.0015
0.9999 0.0001 0.0000
0.9997 0.0001 0.0002
0.9776 0.0220 0.0004
0.9995 0.0004 0.0001
0.9995 0.0000 0.0005
1.0000 0.0000 0.0000
0.9997 0.0002 0.0001
0.8938 0.1057 0.0005
0.9995 0.0002 0.0003
0.9999 0.0000 0.0001
0.9990 0.0004 0.0007
0.9981 0.0017 0.0003
0.9970 0.0006 0.0024
0.9994 0.0000 0.0006
0.9996 0.0001 0.0003
0.9998 0.0000 0.0002
0.9994 0.0002 0.0004
1.0000 0.0000 0.0000
0.9998 0.0002 0.0000
1.0000 0.0000 0.0000
0.4624 0.0381 0.4995
0.9981 0.0019 0.0000
0.9999 0.0001 0.0000
0.9951 0.0019 0.0030
0.9993 0.0002 0.0004
0.9890 0.0001 0.0109
1.0000 0.0000 0.0000
0.9949 0.0044 0.0007
0.9931 0.0000 0.0069
0.9970 0.0000 0.0030
0.9479 0.0493 0.0028
0.9999 0.0000 0.0001
1.0000 0.0000 0.0000
0.9978 0.0004 0.0019
0.9999 0.0001 0.0000
0.9999 0.0000 0.0001
0.9994 0.0002 0.0004
0.9998 0.0001 0.0001
0.9999 0.0001 0.0000
0.9854 0.0124 0.0022
1.0000 0.0000 0.0000
0.9895 0.0032 0.0073
0.9978 0.0001 0.0021
0.9999 0.0000 0.0000
0.9991 0.0001 0.0007
0.9990 0.0000 0.0010
1.0000 0.0000 0.0000
0.9979 0.0000 0.0021
1.0000 0.0000 0.0000
0.9999 0.0000 0.0001
1.0000 0.0000 0.0000
1.0000 0.0000 0.0000
1.0000 0.0000 0.0000
0.9999 0.0000 0.0001
0.9994 0.0000 0.0006
0.9813 0.0030 0.0157
0.9999 0.0001 0.0000
1.0000 0.0000 0.0000
1.0000 0.0000 0.0000
0.9999 0.0000 0.0000
0.9950 0.0043 0.0007
0.9997 0.0002 0.0001
0.9808 0.0025 0.0166
0.9903 0.0095 0.0002
0.9990 0.0000 0.0009
0.9257 0.0728 0.0015
0.9999 0.0000 0.0001
0.9999 0.0000 0.0001
0.9990 0.0000 0.0010
0.9968 0.0027 0.0005
0.9999 0.0000 0.0001
1.0000 0.0000 0.0000
0.9995 0.0003 0.0002
0.9989 0.0003 0.0008
1.0000 0.0000 0.0000
0.9999 0.0000 0.0001
1.0000 0.0000 0.0000
1.0000 0.0000 0.0000
0.9996 0.0003 0.0001
0.9952 0.0003 0.0045
1.0000 0.0000 0.0000
0.9997 0.0003 0.0000
0.9991 0.0008 0.0001
0.9873 0.0026 0.0101
0.9999 0.0001 0.0000
1.0000 0.0000 0.0000
1.0000 0.0000 0.0000
1.0000 0.0000 0.0000
1.0000 0.0000 0.0000
1.0000 0.0000 0.0000
1.0000 0.0000 0.0000
1.0000 0.0000 0.0000
1.0000 0.0000 0.0000
0.9998 0.0002 0.0000
0.9981 0.0003 0.0016
0.9909 0.0083 0.0008
1.0000 0.0000 0.0000
0.7336 0.0001 0.2663
0.9980 0.0000 0.0020
0.9998 0.0000 0.0002
0.9993 0.0003 0.0004
0.9393 0.0045 0.0562
0.9999 0.0000 0.0001
0.9998 0.0001 0.0001
1.0000 0.0000 0.0000
0.9999 0.0000 0.0001
1.0000 0.0000 0.0000
0.9988 0.0006 0.0006
0.9997 0.0003 0.0000
0.9920 0.0074 0.0006
0.9995 0.0002 0.0002
1.0000 0.0000 0.0000
0.9918 0.0073 0.0009
0.9998 0.0000 0.0002
0.9993 0.0005 0.0002
0.9987 0.0013 0.0000
0.9999 0.0001 0.0000
0.9993 0.0006 0.0000
0.9997 0.0000 0.0003
1.0000 0.0000 0.0000
1.0000 0.0000 0.0000
1.0000 0.0000 0.0000
1.0000 0.0000 0.0000
0.9972 0.0000 0.0028
1.0000 0.0000 0.0000
0.9677 0.0256 0.0067
1.0000 0.0000 0.0000
0.9991 0.0001 0.0008
1.0000 0.0000 0.0000
0.9950 0.0006 0.0044
0.9993 0.0003 0.0004
1.0000 0.0000 0.0000
0.9997 0.0002 0.0001
0.9915 0.0083 0.0003
0.9995 0.0005 0.0001
0.9976 0.0002 0.0023
0.9791 0.0207 0.0002
0.9989 0.0005 0.0006
0.9999 0.0001 0.0000
0.9991 0.0006 0.0003
0.9999 0.0000 0.0000
0.9976 0.0011 0.0013
0.9993 0.0001 0.0006
0.9972 0.0013 0.0015
0.9989 0.0002 0.0009
0.9983 0.0005 0.0011
1.0000 0.0000 0.0000
0.9981 0.0003 0.0015
0.9961 0.0035 0.0004
1.0000 0.0000 0.0000
0.9970 0.0029 0.0001
0.9983 0.0017 0.0000
0.9980 0.0017 0.0004
0.9880 0.0113 0.0006
0.9935 0.0065 0.0001
0.9991 0.0007 0.0002
0.9814 0.0159 0.0027
1.0000 0.0000 0.0000
0.9928 0.0071 0.0001
0.9999 0.0000 0.0001
0.9975 0.0019 0.0005
0.9976 0.0023 0.0000
0.9943 0.0001 0.0056
0.9979 0.0020 0.0001
0.9003 0.0994 0.0002
1.0000 0.0000 0.0000
0.9265 0.0051 0.0685
0.9965 0.0026 0.0009
0.9999 0.0000 0.0001
0.9998 0.0001 0.0001
0.9980 0.0016 0.0004
0.9975 0.0003 0.0023
0.9994 0.0001 0.0005
0.9977 0.0015 0.0009
0.9997 0.0000 0.0003
0.9995 0.0004 0.0001
0.9999 0.0000 0.0001
0.9997 0.0000 0.0002
0.9990 0.0001 0.0009
1.0000 0.0000 0.0000
0.9971 0.0002 0.0027
0.9999 0.0000 0.0000
1.0000 0.0000 0.0000
0.9991 0.0009 0.0000
0.9999 0.0000 0.0001
0.9994 0.0002 0.0003
0.9997 0.0000 0.0002
1.0000 0.0000 0.0000
1.0000 0.0000 0.0000
0.9996 0.0003 0.0001
0.9997 0.0002 0.0001
0.9992 0.0003 0.0005
0.9977 0.0010 0.0013
0.9996 0.0001 0.0003
0.9996 0.0002 0.0002
0.9999 0.0000 0.0000
0.9988 0.0012 0.0000
0.9958 0.0013 0.0029
0.9997 0.0001 0.0001
0.9998 0.0000 0.0002
0.9961 0.0023 0.0016
1.0000 0.0000 0.0000
1.0000 0.0000 0.0000
0.9989 0.0002 0.0009
0.9995 0.0005 0.0000
1.0000 0.0000 0.0000
0.9750 0.0224 0.0026
1.0000 0.0000 0.0000
1.0000 0.0000 0.0000
0.9996 0.0000 0.0004
1.0000 0.0000 0.0000
0.9999 0.0001 0.0000
1.0000 0.0000 0.0000
0.9999 0.0000 0.0001
0.9999 0.0001 0.0000
0.9996 0.0002 0.0002
0.9854 0.0091 0.0056
0.9998 0.0002 0.0000
0.9937 0.0061 0.0002
0.9967 0.0005 0.0028
0.9994 0.0006 0.0000
0.9993 0.0005 0.0003
1.0000 0.0000 0.0000
0.9993 0.0006 0.0001
1.0000 0.0000 0.0000
0.9985 0.0014 0.0000
0.9993 0.0001 0.0005
0.9998 0.0002 0.0000
1.0000 0.0000 0.0000
1.0000 0.0000 0.0000
0.9975 0.0025 0.0000
0.9997 0.0003 0.0000
1.0000 0.0000 0.0000
0.9986 0.0012 0.0001
0.9999 0.0001 0.0000
0.9714 0.0242 0.0044
0.9993 0.0004 0.0004
1.0000 0.0000 0.0000
1.0000 0.0000 0.0000
0.9892 0.0106 0.0001
0.9997 0.0002 0.0001
0.9965 0.0027 0.0008
1.0000 0.0000 0.0000
0.9999 0.0000 0.0000
1.0000 0.0000 0.0000
0.9999 0.0001 0.0001
1.0000 0.0000 0.0000
1.0000 0.0000 0.0000
1.0000 0.0000 0.0000
0.9999 0.0000 0.0000
0.9997 0.0001 0.0002
0.9988 0.0001 0.0011
1.0000 0.0000 0.0000
1.0000 0.0000 0.0000
1.0000 0.0000 0.0000
0.9999 0.0001 0.0001
0.9999 0.0000 0.0001
0.9950 0.0048 0.0002
1.0000 0.0000 0.0000
1.0000 0.0000 0.0000
1.0000 0.0000 0.0000
0.9998 0.0002 0.0000
0.9978 0.0001 0.0021
0.9999 0.0000 0.0001
1.0000 0.0000 0.0000
1.0000 0.0000 0.0000
0.9998 0.0000 0.0002
0.9990 0.0000 0.0010
1.0000 0.0000 0.0000
0.9975 0.0001 0.0024
1.0000 0.0000 0.0000
0.9998 0.0000 0.0002
1.0000 0.0000 0.0000
1.0000 0.0000 0.0000
0.9976 0.0000 0.0023
1.0000 0.0000 0.0000
1.0000 0.0000 0.0000
1.0000 0.0000 0.0000
1.0000 0.0000 0.0000
1.0000 0.0000 0.0000
0.9999 0.0000 0.0001
1.0000 0.0000 0.0000
1.0000 0.0000 0.0000
0.9999 0.0000 0.0001
0.9993 0.0000 0.0007
0.9954 0.0014 0.0031
0.9996 0.0002 0.0002
0.9995 0.0001 0.0005
0.9999 0.0000 0.0001
0.9995 0.0000 0.0004
0.9999 0.0000 0.0001
0.9997 0.0000 0.0003
0.9999 0.0000 0.0001
0.9779 0.0000 0.0221
1.0000 0.0000 0.0000
1.0000 0.0000 0.0000
0.9997 0.0001 0.0002
0.9998 0.0000 0.0002
0.9999 0.0000 0.0001
1.0000 0.0000 0.0000
1.0000 0.0000 0.0000
0.9999 0.0000 0.0001
1.0000 0.0000 0.0000
0.9995 0.0000 0.0004
0.9992 0.0002 0.0006
1.0000 0.0000 0.0000
0.9999 0.0000 0.0001
0.9997 0.0001 0.0002
1.0000 0.0000 0.0000
0.9995 0.0000 0.0004
0.9372 0.0546 0.0082
0.9994 0.0001 0.0005
1.0000 0.0000 0.0000
1.0000 0.0000 0.0000
0.9979 0.0000 0.0021
0.9771 0.0000 0.0229
1.0000 0.0000 0.0000
0.9996 0.0000 0.0004
1.0000 0.0000 0.0000
0.9998 0.0000 0.0002
1.0000 0.0000 0.0000
1.0000 0.0000 0.0000
1.0000 0.0000 0.0000
1.0000 0.0000 0.0000
1.0000 0.0000 0.0000
1.0000 0.0000 0.0000
0.9992 0.0003 0.0005
0.9975 0.0000 0.0024
1.0000 0.0000 0.0000
0.9999 0.0000 0.0001
1.0000 0.0000 0.0000
0.9992 0.0000 0.0008
0.9993 0.0000 0.0007
0.9990 0.0001 0.0009
1.0000 0.0000 0.0000
0.9998 0.0000 0.0001
0.9999 0.0000 0.0001
0.9999 0.0000 0.0001
1.0000 0.0000 0.0000
1.0000 0.0000 0.0000
0.9625 0.0000 0.0375
0.9994 0.0000 0.0006
0.9998 0.0002 0.0000
0.9999 0.0001 0.0001
0.9980 0.0005 0.0015
0.9860 0.0085 0.0055
1.0000 0.0000 0.0000
0.9974 0.0000 0.0026
0.9847 0.0002 0.0150
0.9998 0.0000 0.0002
0.9988 0.0012 0.0000
0.9987 0.0013 0.0001
0.9984 0.0002 0.0013
0.9995 0.0000 0.0005
0.9998 0.0000 0.0002
0.9999 0.0001 0.0000
0.9997 0.0000 0.0003
0.9999 0.0000 0.0001
0.9994 0.0001 0.0006
0.9998 0.0000 0.0002
1.0000 0.0000 0.0000
0.9961 0.0039 0.0000
0.9992 0.0008 0.0000
1.0000 0.0000 0.0000
0.9999 0.0001 0.0000
1.0000 0.0000 0.0000
0.9515 0.0484 0.0000
0.9925 0.0070 0.0005
0.9997 0.0003 0.0000
0.9980 0.0017 0.0003
0.9996 0.0000 0.0004
0.9990 0.0007 0.0003
0.8358 0.1621 0.0022
0.6135 0.3861 0.0005
0.9999 0.0000 0.0001
0.9999 0.0000 0.0001
0.9751 0.0221 0.0028
1.0000 0.0000 0.0000
0.9998 0.0000 0.0001
0.9695 0.0303 0.0002
1.0000 0.0000 0.0000
0.9995 0.0003 0.0002
0.9996 0.0001 0.0003
0.9998 0.0000 0.0002
1.0000 0.0000 0.0000
1.0000 0.0000 0.0000
1.0000 0.0000 0.0000
1.0000 0.0000 0.0000
0.9998 0.0000 0.0002
0.9945 0.0000 0.0055
0.9630 0.0001 0.0369
1.0000 0.0000 0.0000
1.0000 0.0000 0.0000
1.0000 0.0000 0.0000
0.9998 0.0000 0.0002
0.9998 0.0001 0.0002
1.0000 0.0000 0.0000
1.0000 0.0000 0.0000
0.9999 0.0000 0.0001
1.0000 0.0000 0.0000
1.0000 0.0000 0.0000
1.0000 0.0000 0.0000
1.0000 0.0000 0.0000
0.9999 0.0000 0.0001
0.9998 0.0000 0.0002
1.0000 0.0000 0.0000
1.0000 0.0000 0.0000
0.9999 0.0000 0.0000
0.9998 0.0000 0.0002
0.9995 0.0001 0.0004
0.9999 0.0000 0.0000
1.0000 0.0000 0.0000
0.9999 0.0000 0.0001
0.9997 0.0000 0.0002
1.0000 0.0000 0.0000
1.0000 0.0000 0.0000
0.9975 0.0000 0.0025
0.9973 0.0001 0.0026
0.9987 0.0003 0.0009
0.9999 0.0000 0.0000
0.9996 0.0001 0.0003
0.9985 0.0006 0.0009
0.9993 0.0000 0.0006
0.9997 0.0000 0.0002
1.0000 0.0000 0.0000
1.0000 0.0000 0.0000
0.9986 0.0000 0.0014
0.9995 0.0002 0.0003
0.9997 0.0001 0.0002
0.9991 0.0001 0.0008
1.0000 0.0000 0.0000
0.9998 0.0001 0.0002
0.9998 0.0000 0.0002
1.0000 0.0000 0.0000
0.9999 0.0000 0.0001
0.9997 0.0000 0.0003
0.9979 0.0000 0.0021
0.9996 0.0000 0.0004
0.9999 0.0000 0.0001
0.9996 0.0000 0.0004
1.0000 0.0000 0.0000
0.9999 0.0000 0.0001
0.9998 0.0000 0.0002
0.9995 0.0005 0.0000
1.0000 0.0000 0.0000
0.9999 0.0000 0.0001
0.9999 0.0000 0.0001
0.9960 0.0000 0.0039
0.9999 0.0001 0.0001
1.0000 0.0000 0.0000
0.9967 0.0003 0.0030
0.9994 0.0001 0.0005
1.0000 0.0000 0.0000
0.9990 0.0000 0.0010
1.0000 0.0000 0.0000
0.9997 0.0000 0.0003
0.9993 0.0001 0.0006
0.9985 0.0015 0.0000
1.0000 0.0000 0.0000
0.9994 0.0005 0.0001
0.9977 0.0006 0.0018
0.9962 0.0023 0.0015
0.9999 0.0000 0.0000
0.9999 0.0000 0.0001
0.9963 0.0000 0.0037
0.9990 0.0001 0.0009
1.0000 0.0000 0.0000
0.9885 0.0000 0.0115
0.9998 0.0000 0.0002
0.9999 0.0000 0.0001
0.9994 0.0000 0.0006
0.9980 0.0000 0.0019
0.9998 0.0002 0.0000
1.0000 0.0000 0.0000
1.0000 0.0000 0.0000
1.0000 0.0000 0.0000
0.9998 0.0002 0.0000
0.9997 0.0003 0.0000
0.9879 0.0008 0.0113
0.9998 0.0000 0.0001
0.9990 0.0008 0.0002
0.9966 0.0002 0.0031
0.9998 0.0000 0.0002
1.0000 0.0000 0.0000
0.9996 0.0000 0.0004
0.9970 0.0001 0.0029
0.9925 0.0001 0.0074
0.9995 0.0002 0.0002
1.0000 0.0000 0.0000
0.9998 0.0000 0.0001
1.0000 0.0000 0.0000
0.9996 0.0000 0.0004
0.9983 0.0000 0.0017
1.0000 0.0000 0.0000
0.9998 0.0000 0.0002
1.0000 0.0000 0.0000
0.9998 0.0000 0.0001
0.9978 0.0002 0.0020
1.0000 0.0000 0.0000
0.9997 0.0000 0.0003
1.0000 0.0000 0.0000
1.0000 0.0000 0.0000
0.9999 0.0000 0.0001
1.0000 0.0000 0.0000
1.0000 0.0000 0.0000
0.9995 0.0000 0.0005
0.9999 0.0000 0.0000
0.9996 0.0000 0.0004
1.0000 0.0000 0.0000
0.9998 0.0002 0.0000
0.9983 0.0009 0.0009
1.0000 0.0000 0.0000
0.9866 0.0000 0.0134
1.0000 0.0000 0.0000
0.9999 0.0001 0.0000
0.9996 0.0003 0.0000
0.9999 0.0000 0.0000
0.9996 0.0002 0.0001
0.9999 0.0000 0.0000
0.9996 0.0000 0.0004
0.9999 0.0000 0.0001
0.9995 0.0000 0.0005
1.0000 0.0000 0.0000
1.0000 0.0000 0.0000
0.9999 0.0000 0.0001
1.0000 0.0000 0.0000
0.9999 0.0000 0.0001
1.0000 0.0000 0.0000
0.9994 0.0000 0.0005
0.9999 0.0000 0.0001
0.9999 0.0000 0.0001
1.0000 0.0000 0.0000
0.7800 0.0103 0.2097
0.9989 0.0011 0.0000
0.9999 0.0000 0.0001
1.0000 0.0000 0.0000
1.0000 0.0000 0.0000
1.0000 0.0000 0.0000
0.9998 0.0001 0.0001
0.9861 0.0139 0.0000
1.0000 0.0000 0.0000
0.9999 0.0000 0.0001
1.0000 0.0000 0.0000
0.9995 0.0000 0.0005
1.0000 0.0000 0.0000
1.0000 0.0000 0.0000
1.0000 0.0000 0.0000
0.9998 0.0002 0.0000
0.9999 0.0001 0.0000
1.0000 0.0000 0.0000
1.0000 0.0000 0.0000
0.9996 0.0000 0.0004
0.9999 0.0001 0.0000
1.0000 0.0000 0.0000
0.9999 0.0000 0.0001
1.0000 0.0000 0.0000
0.9999 0.0000 0.0001
0.9976 0.0023 0.0001
0.9986 0.0011 0.0003
0.9995 0.0004 0.0001
0.9993 0.0001 0.0006
0.9933 0.0016 0.0051
0.9994 0.0000 0.0005
0.9982 0.0009 0.0009
0.9933 0.0000 0.0067
0.9982 0.0001 0.0017
0.9835 0.0143 0.0022
0.9987 0.0004 0.0008
0.9463 0.0352 0.0185
0.9997 0.0002 0.0001
0.9997 0.0000 0.0003
0.9998 0.0001 0.0000
0.9992 0.0002 0.0006
0.9998 0.0001 0.0001
0.9996 0.0003 0.0001
0.9970 0.0001 0.0030
0.9996 0.0000 0.0004
0.9934 0.0064 0.0002
0.9966 0.0034 0.0000
1.0000 0.0000 0.0000
0.9999 0.0000 0.0000
0.9994 0.0001 0.0006
0.9999 0.0000 0.0001
0.9999 0.0001 0.0000
0.4398 0.0163 0.5440
0.9996 0.0004 0.0000
1.0000 0.0000 0.0000
0.9999 0.0000 0.0001
0.9997 0.0002 0.0001
0.9998 0.0001 0.0001
1.0000 0.0000 0.0000
0.9999 0.0000 0.0000
1.0000 0.0000 0.0000
0.9998 0.0000 0.0002
0.9949 0.0000 0.0051
1.0000 0.0000 0.0000
0.9991 0.0001 0.0009
1.0000 0.0000 0.0000
0.9994 0.0006 0.0000
1.0000 0.0000 0.0000
0.9972 0.0021 0.0007
1.0000 0.0000 0.0000
0.9996 0.0001 0.0003
0.9993 0.0001 0.0006
0.9998 0.0002 0.0000
0.9925 0.0074 0.0000
0.9999 0.0001 0.0000
0.9997 0.0001 0.0002
0.9999 0.0001 0.0000
0.9982 0.0006 0.0012
0.9424 0.0010 0.0566
0.9991 0.0008 0.0000
0.9994 0.0005 0.0002
0.9999 0.0000 0.0001
0.9999 0.0001 0.0000
1.0000 0.0000 0.0000
1.0000 0.0000 0.0000
0.9997 0.0000 0.0003
0.9986 0.0002 0.0013
0.9999 0.0001 0.0000
1.0000 0.0000 0.0000
0.9996 0.0004 0.0001
0.9999 0.0001 0.0000
1.0000 0.0000 0.0000
1.0000 0.0000 0.0000
1.0000 0.0000 0.0000
0.9999 0.0001 0.0000
1.0000 0.0000 0.0000
0.9983 0.0003 0.0014
0.9980 0.0004 0.0017
0.9997 0.0001 0.0002
0.9998 0.0002 0.0000
0.9970 0.0004 0.0026
0.9998 0.0001 0.0001
0.9988 0.0009 0.0003
0.9998 0.0000 0.0002
0.9995 0.0001 0.0005
1.0000 0.0000 0.0000
0.9999 0.0000 0.0000
0.9997 0.0000 0.0002
1.0000 0.0000 0.0000
0.9996 0.0000 0.0004
1.0000 0.0000 0.0000
1.0000 0.0000 0.0000
1.0000 0.0000 0.0000
0.9996 0.0000 0.0004
1.0000 0.0000 0.0000
1.0000 0.0000 0.0000
1.0000 0.0000 0.0000
0.9999 0.0001 0.0000
0.9999 0.0000 0.0000
0.9983 0.0014 0.0003
0.9998 0.0000 0.0002
0.9990 0.0000 0.0010
1.0000 0.0000 0.0000
0.9999 0.0001 0.0000
0.9998 0.0000 0.0002
0.9997 0.0001 0.0001
0.9998 0.0002 0.0000
0.9985 0.0015 0.0000
1.0000 0.0000 0.0000
1.0000 0.0000 0.0000
1.0000 0.0000 0.0000
0.9976 0.0000 0.0023
0.9998 0.0000 0.0002
1.0000 0.0000 0.0000
0.9999 0.0001 0.0001
1.0000 0.0000 0.0000
0.9999 0.0000 0.0001
0.9934 0.0009 0.0057
0.9978 0.0009 0.0013
1.0000 0.0000 0.0000
0.9982 0.0018 0.0000
1.0000 0.0000 0.0000
0.9999 0.0000 0.0001
0.9981 0.0000 0.0019
1.0000 0.0000 0.0000
1.0000 0.0000 0.0000
0.9999 0.0000 0.0001
0.9997 0.0000 0.0003
1.0000 0.0000 0.0000
0.9999 0.0000 0.0001
0.9999 0.0000 0.0001
0.9986 0.0000 0.0014
1.0000 0.0000 0.0000
0.7536 0.0010 0.2455
1.0000 0.0000 0.0000
0.9645 0.0000 0.0355
0.9995 0.0001 0.0004
0.9943 0.0002 0.0056
0.9990 0.0001 0.0009
1.0000 0.0000 0.0000
0.9999 0.0000 0.0000
0.9984 0.0002 0.0014
1.0000 0.0000 0.0000
0.9943 0.0035 0.0022
1.0000 0.0000 0.0000
1.0000 0.0000 0.0000
0.9998 0.0002 0.0001
0.9999 0.0001 0.0000
0.9441 0.0516 0.0043
0.9855 0.0110 0.0035
0.9986 0.0014 0.0001
1.0000 0.0000 0.0000
1.0000 0.0000 0.0000
1.0000 0.0000 0.0000
0.9996 0.0003 0.0001
1.0000 0.0000 0.0000
0.9998 0.0000 0.0001
0.9997 0.0002 0.0001
0.9978 0.0003 0.0019
1.0000 0.0000 0.0000
0.9947 0.0019 0.0034
0.9987 0.0012 0.0000
0.9999 0.0001 0.0000
0.9996 0.0001 0.0002
1.0000 0.0000 0.0000
1.0000 0.0000 0.0000
1.0000 0.0000 0.0000
0.9993 0.0006 0.0001
0.9795 0.0195 0.0010
0.9550 0.0075 0.0376
0.9777 0.0213 0.0010
0.9522 0.0095 0.0383
1.0000 0.0000 0.0000
0.9676 0.0001 0.0323
0.9999 0.0000 0.0000
1.0000 0.0000 0.0000
1.0000 0.0000 0.0000
0.9958 0.0002 0.0039
1.0000 0.0000 0.0000
1.0000 0.0000 0.0000
0.9999 0.0001 0.0000
0.9999 0.0001 0.0000
0.9539 0.0011 0.0450
0.9999 0.0001 0.0000
0.9999 0.0000 0.0001
0.9986 0.0013 0.0001
0.9998 0.0001 0.0001
0.9999 0.0000 0.0001
0.9996 0.0000 0.0003
1.0000 0.0000 0.0000
1.0000 0.0000 0.0000
1.0000 0.0000 0.0000
1.0000 0.0000 0.0000
0.9997 0.0002 0.0000
0.9999 0.0000 0.0001
0.9998 0.0000 0.0002
0.9965 0.0006 0.0029
0.9966 0.0009 0.0025
0.9986 0.0000 0.0014
0.9998 0.0001 0.0000
0.9987 0.0001 0.0012
1.0000 0.0000 0.0000
0.9992 0.0001 0.0008
0.9998 0.0000 0.0002
0.9988 0.0008 0.0004
0.9962 0.0023 0.0014
0.9997 0.0000 0.0002
1.0000 0.0000 0.0000
0.9737 0.0007 0.0256
0.9993 0.0000 0.0006
1.0000 0.0000 0.0000
0.9971 0.0001 0.0028
0.9986 0.0000 0.0014
0.9988 0.0001 0.0011
1.0000 0.0000 0.0000
0.9996 0.0004 0.0001
0.5535 0.0292 0.4173
0.9979 0.0000 0.0020
0.9999 0.0001 0.0000
0.9998 0.0000 0.0002
0.9991 0.0001 0.0008
0.9958 0.0001 0.0041
0.9998 0.0000 0.0002
0.9739 0.0030 0.0231
0.9940 0.0000 0.0060
0.9919 0.0079 0.0003
0.9998 0.0000 0.0002
0.9884 0.0038 0.0078
1.0000 0.0000 0.0000
0.9988 0.0000 0.0011
0.9709 0.0271 0.0020
0.9972 0.0023 0.0005
0.9999 0.0000 0.0001
0.9955 0.0009 0.0037
0.9868 0.0023 0.0109
0.9992 0.0001 0.0007
0.9999 0.0000 0.0001
0.9997 0.0003 0.0000
0.9988 0.0003 0.0009
0.9998 0.0000 0.0002
0.9997 0.0000 0.0003
1.0000 0.0000 0.0000
0.9999 0.0000 0.0000
0.9999 0.0000 0.0000
0.9999 0.0001 0.0001
0.9915 0.0067 0.0018
0.9997 0.0003 0.0001
0.9764 0.0095 0.0141
0.9867 0.0005 0.0128
0.9931 0.0037 0.0031
0.9978 0.0010 0.0012
0.9988 0.0000 0.0012
1.0000 0.0000 0.0000
0.9999 0.0000 0.0001
0.9991 0.0002 0.0007
0.9995 0.0000 0.0005
0.9969 0.0002 0.0030
0.9999 0.0000 0.0001
1.0000 0.0000 0.0000
0.9998 0.0000 0.0002
0.9997 0.0000 0.0003
1.0000 0.0000 0.0000
1.0000 0.0000 0.0000
0.9995 0.0001 0.0004
0.9983 0.0013 0.0003
0.9988 0.0000 0.0012
0.9990 0.0008 0.0002
0.9994 0.0006 0.0000
1.0000 0.0000 0.0000
1.0000 0.0000 0.0000
1.0000 0.0000 0.0000
0.9995 0.0002 0.0003
0.9983 0.0008 0.0009
0.9995 0.0000 0.0005
0.9993 0.0001 0.0007
1.0000 0.0000 0.0000
0.9985 0.0015 0.0000
0.9923 0.0045 0.0032
0.9998 0.0001 0.0002
0.9969 0.0028 0.0003
1.0000 0.0000 0.0000
0.7834 0.1409 0.0758
0.9963 0.0031 0.0007
0.9790 0.0193 0.0017
0.9991 0.0008 0.0000
1.0000 0.0000 0.0000
0.9992 0.0007 0.0001
1.0000 0.0000 0.0000
0.9996 0.0001 0.0003
0.9675 0.0096 0.0229
0.9966 0.0015 0.0018
0.9865 0.0111 0.0024
0.9988 0.0011 0.0001
0.8819 0.0810 0.0372
0.8975 0.1025 0.0000
1.0000 0.0000 0.0000
0.9943 0.0056 0.0001
0.9728 0.0270 0.0002
0.9748 0.0251 0.0002
0.9319 0.0680 0.0001
0.9808 0.0187 0.0006
0.9454 0.0376 0.0170
0.9981 0.0019 0.0000
0.9952 0.0046 0.0002
0.9995 0.0000 0.0005
0.9987 0.0010 0.0003
0.9943 0.0057 0.0000
0.9998 0.0000 0.0001
0.9563 0.0413 0.0024
0.9862 0.0007 0.0131
0.9991 0.0000 0.0008
1.0000 0.0000 0.0000
0.9994 0.0000 0.0006
1.0000 0.0000 0.0000
0.9987 0.0005 0.0008
0.9984 0.0016 0.0000
1.0000 0.0000 0.0000
0.9722 0.0108 0.0170
0.9980 0.0020 0.0000
0.1318 0.8658 0.0025
1.0000 0.0000 0.0000
0.9941 0.0031 0.0028
1.0000 0.0000 0.0000
0.9997 0.0000 0.0003
1.0000 0.0000 0.0000
1.0000 0.0000 0.0000
0.9954 0.0001 0.0045
0.8800 0.0008 0.1192
0.9984 0.0003 0.0013
0.9999 0.0001 0.0000
0.9983 0.0003 0.0014
1.0000 0.0000 0.0000
0.9997 0.0000 0.0003
1.0000 0.0000 0.0000
0.9972 0.0000 0.0028
0.9998 0.0000 0.0002
0.9994 0.0006 0.0000
0.9990 0.0009 0.0001
0.9992 0.0000 0.0008
0.9998 0.0001 0.0000
1.0000 0.0000 0.0000
0.9327 0.0028 0.0644
0.9761 0.0234 0.0006
0.9997 0.0002 0.0000
0.9758 0.0046 0.0196
1.0000 0.0000 0.0000
0.9978 0.0003 0.0019
0.9999 0.0001 0.0000
1.0000 0.0000 0.0000
0.9999 0.0000 0.0001
0.9998 0.0001 0.0002
0.9997 0.0002 0.0001
1.0000 0.0000 0.0000
0.9997 0.0001 0.0002
1.0000 0.0000 0.0000
0.9992 0.0000 0.0008
0.9962 0.0034 0.0004
0.9745 0.0232 0.0022
1.0000 0.0000 0.0000
0.9998 0.0000 0.0002
0.9997 0.0001 0.0002
0.9995 0.0003 0.0003
0.9998 0.0001 0.0001
0.9914 0.0051 0.0035
0.9952 0.0048 0.0000
0.9976 0.0008 0.0016
1.0000 0.0000 0.0000
1.0000 0.0000 0.0000
0.9995 0.0001 0.0004
1.0000 0.0000 0.0000
0.9984 0.0015 0.0002
0.9956 0.0034 0.0010
0.9998 0.0000 0.0002
1.0000 0.0000 0.0000
0.9653 0.0000 0.0346
0.9909 0.0008 0.0083
0.9988 0.0000 0.0012
0.9997 0.0002 0.0001
0.9998 0.0000 0.0001
0.9374 0.0007 0.0619
0.9886 0.0029 0.0085
0.9989 0.0000 0.0011
1.0000 0.0000 0.0000
0.9998 0.0001 0.0002
0.9977 0.0001 0.0022
0.9940 0.0001 0.0059
0.9996 0.0000 0.0004
0.9641 0.0012 0.0348
0.9999 0.0001 0.0000
0.9999 0.0001 0.0000
0.9976 0.0004 0.0020
1.0000 0.0000 0.0000
0.9999 0.0001 0.0000
0.9989 0.0000 0.0011
0.9998 0.0001 0.0001
0.9994 0.0000 0.0006
0.9982 0.0001 0.0017
1.0000 0.0000 0.0000
0.9999 0.0000 0.0000
0.9977 0.0000 0.0023
0.9953 0.0004 0.0044
0.9986 0.0003 0.0010
0.9512 0.0101 0.0387
1.0000 0.0000 0.0000
0.9990 0.0005 0.0005
0.9992 0.0001 0.0007
0.9801 0.0003 0.0195
0.9991 0.0003 0.0006
0.9999 0.0000 0.0000
0.9996 0.0004 0.0000
0.9996 0.0000 0.0004
0.9974 0.0001 0.0025
1.0000 0.0000 0.0000
1.0000 0.0000 0.0000
0.9993 0.0002 0.0005
0.9999 0.0001 0.0000
0.9992 0.0005 0.0004
1.0000 0.0000 0.0000
0.9998 0.0000 0.0001
0.9992 0.0006 0.0001
0.9983 0.0017 0.0001
0.9997 0.0002 0.0001
0.9999 0.0000 0.0001
0.9989 0.0005 0.0006
1.0000 0.0000 0.0000
0.9995 0.0004 0.0001
0.9973 0.0004 0.0023
0.9995 0.0005 0.0000
1.0000 0.0000 0.0000
0.9998 0.0001 0.0001
0.9997 0.0002 0.0000
0.9992 0.0007 0.0001
0.9994 0.0000 0.0005
0.9967 0.0019 0.0015
0.9998 0.0001 0.0000
0.9992 0.0001 0.0007
1.0000 0.0000 0.0000
0.9999 0.0001 0.0000
1.0000 0.0000 0.0000
0.9947 0.0037 0.0016
0.9987 0.0001 0.0012
0.9525 0.0010 0.0465
0.9999 0.0001 0.0000
0.9970 0.0011 0.0018
0.9970 0.0003 0.0027
0.9999 0.0000 0.0001
0.9998 0.0000 0.0002
0.9996 0.0002 0.0002
0.9982 0.0013 0.0005
0.9999 0.0001 0.0001
0.9715 0.0265 0.0020
1.0000 0.0000 0.0000
1.0000 0.0000 0.0000
0.9997 0.0002 0.0001
0.9999 0.0001 0.0000
1.0000 0.0000 0.0000
0.2172 0.7800 0.0028
1.0000 0.0000 0.0000
1.0000 0.0000 0.0000
1.0000 0.0000 0.0000
0.9999 0.0001 0.0000
1.0000 0.0000 0.0000
1.0000 0.0000 0.0000
0.9998 0.0002 0.0000
0.9361 0.0037 0.0602
0.9993 0.0007 0.0000
1.0000 0.0000 0.0000
0.9997 0.0003 0.0000
0.9999 0.0001 0.0000
1.0000 0.0000 0.0000
0.9933 0.0065 0.0002
0.9879 0.0121 0.0000
0.9872 0.0128 0.0000
0.9944 0.0056 0.0000
0.9957 0.0043 0.0000
0.9999 0.0000 0.0001
0.9985 0.0015 0.0000
0.8334 0.1457 0.0209
0.9980 0.0020 0.0000
0.9998 0.0001 0.0000
1.0000 0.0000 0.0000
0.9999 0.0000 0.0000
0.9435 0.0565 0.0000
0.9945 0.0017 0.0038
0.9990 0.0005 0.0005
0.9941 0.0059 0.0000
0.9989 0.0000 0.0011
1.0000 0.0000 0.0000
0.9978 0.0006 0.0016
0.9901 0.0000 0.0098
0.9915 0.0002 0.0083
0.9993 0.0006 0.0001
1.0000 0.0000 0.0000
0.9953 0.0018 0.0029
0.9951 0.0046 0.0003
1.0000 0.0000 0.0000
0.9999 0.0001 0.0000
0.9998 0.0001 0.0000
0.9999 0.0001 0.0000
0.9989 0.0000 0.0011
0.9577 0.0422 0.0001
0.9999 0.0001 0.0000
0.9970 0.0003 0.0027
1.0000 0.0000 0.0000
0.9997 0.0001 0.0002
0.9995 0.0005 0.0001
0.9997 0.0003 0.0000
0.9997 0.0003 0.0000
0.9993 0.0007 0.0000
0.9993 0.0000 0.0007
0.9991 0.0001 0.0009
0.9996 0.0003 0.0001
0.6601 0.3394 0.0006
0.9901 0.0079 0.0019
0.9409 0.0399 0.0192
0.9999 0.0000 0.0001
0.9973 0.0025 0.0001
1.0000 0.0000 0.0000
0.9999 0.0000 0.0000
0.9994 0.0004 0.0002
1.0000 0.0000 0.0000
0.9996 0.0002 0.0001
0.6394 0.2863 0.0743
0.8889 0.0947 0.0163
0.6011 0.3978 0.0011
1.0000 0.0000 0.0000
0.9999 0.0000 0.0001
1.0000 0.0000 0.0000
1.0000 0.0000 0.0000
0.9997 0.0003 0.0000
0.9853 0.0138 0.0008
0.9994 0.0006 0.0000
0.9990 0.0010 0.0000
0.9998 0.0001 0.0001
0.9694 0.0017 0.0289
1.0000 0.0000 0.0000
0.9999 0.0000 0.0001
0.9992 0.0006 0.0002
1.0000 0.0000 0.0000
0.9876 0.0118 0.0006
0.9999 0.0000 0.0000
0.9984 0.0007 0.0009
0.9772 0.0104 0.0124
0.9999 0.0001 0.0001
0.9993 0.0006 0.0001
1.0000 0.0000 0.0000
0.9972 0.0002 0.0026
0.9879 0.0103 0.0018
0.9996 0.0004 0.0000
0.9929 0.0000 0.0071
0.9997 0.0001 0.0002
0.9982 0.0018 0.0000
0.9986 0.0007 0.0007
0.9988 0.0000 0.0011
0.9977 0.0023 0.0000
0.0069 0.2246 0.7685
0.9972 0.0001 0.0027
0.9974 0.0024 0.0002
0.9999 0.0000 0.0000
1.0000 0.0000 0.0000
1.0000 0.0000 0.0000
0.9986 0.0000 0.0014
0.9999 0.0001 0.0000
0.9995 0.0003 0.0002
1.0000 0.0000 0.0000
1.0000 0.0000 0.0000
0.9307 0.0566 0.0127
0.9976 0.0020 0.0004
0.9979 0.0008 0.0014
1.0000 0.0000 0.0000
0.9996 0.0002 0.0002
0.9999 0.0000 0.0000
1.0000 0.0000 0.0000
1.0000 0.0000 0.0000
0.9996 0.0002 0.0002
0.9972 0.0007 0.0020
0.9999 0.0001 0.0001
0.9999 0.0000 0.0001
0.9999 0.0000 0.0001
1.0000 0.0000 0.0000
0.9995 0.0001 0.0004
0.9957 0.0031 0.0013
0.9992 0.0000 0.0008
0.9973 0.0017 0.0010
0.9997 0.0000 0.0003
1.0000 0.0000 0.0000
0.9763 0.0003 0.0233
0.9998 0.0000 0.0002
1.0000 0.0000 0.0000
1.0000 0.0000 0.0000
1.0000 0.0000 0.0000
1.0000 0.0000 0.0000
1.0000 0.0000 0.0000
1.0000 0.0000 0.0000
0.9999 0.0001 0.0000
0.9998 0.0000 0.0002
0.9957 0.0001 0.0042
1.0000 0.0000 0.0000
1.0000 0.0000 0.0000
1.0000 0.0000 0.0000
0.9648 0.0015 0.0337
0.9969 0.0000 0.0031
0.2683 0.0945 0.6371
1.0000 0.0000 0.0000
0.9993 0.0001 0.0006
0.9999 0.0000 0.0001
1.0000 0.0000 0.0000
0.9348 0.0001 0.0650
0.9992 0.0000 0.0008
0.9999 0.0000 0.0001
0.9999 0.0000 0.0001
0.9999 0.0000 0.0001
0.9999 0.0000 0.0001
1.0000 0.0000 0.0000
1.0000 0.0000 0.0000
1.0000 0.0000 0.0000
1.0000 0.0000 0.0000
0.9998 0.0000 0.0002
1.0000 0.0000 0.0000
0.9999 0.0000 0.0001
1.0000 0.0000 0.0000
1.0000 0.0000 0.0000
1.0000 0.0000 0.0000
1.0000 0.0000 0.0000
0.9999 0.0000 0.0001
1.0000 0.0000 0.0000
1.0000 0.0000 0.0000
0.9987 0.0008 0.0006
1.0000 0.0000 0.0000
0.9995 0.0005 0.0000
0.9993 0.0000 0.0007
1.0000 0.0000 0.0000
0.9996 0.0002 0.0001
1.0000 0.0000 0.0000
1.0000 0.0000 0.0000
0.9993 0.0006 0.0000
0.9999 0.0001 0.0000
0.9999 0.0001 0.0000
1.0000 0.0000 0.0000
0.9998 0.0001 0.0000
0.9916 0.0002 0.0082
1.0000 0.0000 0.0000
0.9992 0.0004 0.0005
1.0000 0.0000 0.0000
0.9996 0.0003 0.0001
1.0000 0.0000 0.0000
1.0000 0.0000 0.0000
0.9985 0.0015 0.0000
0.9976 0.0006 0.0019
0.9999 0.0000 0.0001
1.0000 0.0000 0.0000
0.0000 1.0000 0.0000
0.0000 0.9998 0.0002
0.0000 0.9999 0.0001
0.0000 1.0000 0.0000
0.0000 1.0000 0.0000
0.0000 1.0000 0.0000
0.0004 0.9995 0.0001
0.0000 1.0000 0.0000
0.0000 0.9982 0.0018
0.0001 0.9954 0.0045
0.0001 0.9996 0.0002
0.0001 0.9999 0.0001
0.0000 1.0000 0.0000
0.0001 0.9988 0.0011
0.0000 1.0000 0.0000
0.0013 0.9987 0.0000
0.0000 0.9987 0.0013
0.0001 0.9996 0.0004
0.0091 0.9655 0.0254
0.0000 0.9991 0.0009
0.0000 0.9999 0.0001
0.0000 0.9988 0.0012
0.0025 0.9447 0.0528
0.0005 0.9978 0.0017
0.0000 0.9998 0.0002
0.0000 0.9971 0.0028
0.0033 0.9951 0.0016
0.0000 0.9995 0.0005
0.0000 0.9921 0.0079
0.0002 0.9992 0.0006
0.0000 0.9984 0.0016
0.0043 0.9899 0.0058
0.0007 0.7869 0.2123
0.0053 0.1070 0.8877
0.0009 0.9662 0.0329
0.0044 0.7662 0.2294
0.0139 0.9767 0.0093
0.0001 0.9951 0.0048
0.0000 0.3950 0.6050
0.0000 0.9950 0.0050
0.0000 0.9950 0.0049
0.0001 0.9948 0.0051
0.0000 0.9979 0.0021
0.0002 0.9915 0.0084
0.0000 0.9817 0.0183
0.0000 0.9860 0.0140
0.0001 0.9993 0.0006
0.0000 0.9984 0.0015
0.0000 0.9998 0.0002
0.0000 0.9886 0.0114
0.0000 0.9896 0.0104
0.0000 0.9999 0.0001
0.0000 0.9996 0.0004
0.0019 0.9716 0.0265
0.0000 0.9999 0.0001
0.0008 0.7415 0.2577
0.0000 0.9998 0.0002
0.0011 0.3467 0.6521
0.0003 0.5919 0.4078
0.0001 0.9961 0.0038
0.0014 0.9948 0.0038
0.0017 0.9945 0.0038
0.0000 0.9994 0.0006
0.0002 0.9973 0.0025
0.0001 0.9987 0.0012
0.0003 0.9840 0.0158
0.0266 0.7056 0.2678
0.0000 0.9951 0.0049
0.0001 0.9998 0.0001
0.0003 0.9972 0.0025
0.0001 0.9983 0.0016
0.0002 0.9994 0.0004
0.0000 0.9993 0.0007
0.0000 0.9996 0.0003
0.0001 0.8820 0.1179
0.0001 0.9995 0.0004
0.0009 0.9242 0.0748
0.0191 0.9798 0.0010
0.0000 0.9977 0.0023
0.0000 0.9961 0.0039
0.0000 0.9994 0.0006
0.0001 0.9972 0.0027
0.0011 0.9968 0.0021
0.0024 0.8154 0.1821
0.0000 0.9999 0.0001
0.0000 0.9981 0.0019
0.0001 0.9995 0.0004
0.0079 0.8850 0.1071
0.0001 0.9998 0.0000
0.0003 0.9953 0.0044
0.0001 0.9936 0.0063
0.0000 0.9995 0.0005
0.0000 0.6273 0.3727
0.0000 0.9997 0.0003
0.0000 0.9996 0.0004
0.0000 0.9982 0.0018
0.0015 0.9985 0.0001
0.0000 0.9998 0.0002
0.0000 0.9998 0.0002
0.0000 1.0000 0.0000
0.0000 0.9999 0.0001
0.0000 0.9994 0.0006
0.0002 0.9928 0.0070
0.0000 0.9654 0.0346
0.0000 0.9935 0.0065
0.0000 0.9996 0.0004
0.0000 0.9999 0.0001
0.0000 0.9999 0.0001
0.0045 0.9925 0.0030
0.0006 0.9993 0.0002
0.0000 0.9982 0.0018
0.0001 0.9803 0.0196
0.0007 0.9908 0.0085
0.0000 0.9918 0.0082
0.0000 0.9955 0.0045
0.0070 0.9921 0.0008
0.0061 0.9205 0.0733
0.0000 0.7608 0.2392
0.0019 0.9980 0.0001
0.0000 0.9994 0.0006
0.0000 0.9994 0.0006
0.0000 0.9999 0.0001
0.0001 0.9994 0.0004
0.0000 0.9950 0.0050
0.0000 1.0000 0.0000
0.0003 0.9954 0.0043
0.0007 0.9976 0.0017
0.0043 0.9909 0.0048
0.0531 0.9037 0.0433
0.0001 0.9960 0.0039
0.0018 0.9968 0.0014
0.0001 0.9998 0.0001
0.0000 0.9972 0.0028
0.0010 0.9919 0.0070
0.0006 0.9978 0.0016
0.0000 0.9998 0.0002
0.0001 0.9989 0.0010
0.0001 0.9997 0.0002
0.0000 0.9983 0.0016
0.0000 1.0000 0.0000
0.0000 0.9999 0.0001
0.0001 0.9994 0.0005
0.0000 0.9999 0.0000
0.0000 0.9995 0.0005
0.0000 0.9972 0.0028
0.0000 0.9999 0.0000
0.0000 1.0000 0.0000
0.0000 0.9995 0.0005
0.0002 0.9985 0.0013
0.0000 0.9932 0.0068
0.0000 0.9998 0.0002
0.0000 0.9999 0.0001
0.0000 1.0000 0.0000
0.0000 0.9994 0.0006
0.0001 0.9999 0.0000
0.0000 1.0000 0.0000
0.0000 0.9998 0.0002
0.0000 0.9987 0.0013
0.0000 0.9999 0.0000
0.0003 0.9997 0.0000
0.0005 0.9982 0.0013
0.0000 1.0000 0.0000
0.0019 0.9963 0.0018
0.0000 0.9999 0.0001
0.0000 0.9996 0.0004
0.0021 0.9916 0.0064
0.0004 0.9993 0.0004
0.0000 0.9999 0.0001
0.0002 0.9985 0.0013
0.0000 0.9999 0.0000
0.0002 0.9995 0.0003
0.0000 0.7553 0.2447
0.0003 0.9995 0.0002
0.0040 0.9658 0.0302
0.0000 0.9991 0.0009
0.0001 0.9999 0.0000
0.0000 0.9991 0.0009
0.0000 0.9995 0.0004
0.0000 1.0000 0.0000
0.0000 0.9858 0.0142
0.0000 1.0000 0.0000
0.0009 0.9987 0.0004
0.0000 0.9951 0.0048
0.0000 1.0000 0.0000
0.0000 1.0000 0.0000
0.0002 0.9998 0.0000
0.0001 0.9953 0.0046
0.0002 0.9992 0.0006
0.0000 0.9997 0.0003
0.0000 0.9999 0.0001
0.0000 0.9999 0.0000
0.0001 0.9998 0.0001
0.0001 0.9998 0.0001
0.0001 0.9993 0.0006
0.0010 0.9984 0.0006
0.0000 0.9971 0.0029
0.0000 0.9997 0.0003
0.0001 0.9997 0.0002
0.0001 0.9989 0.0010
0.0003 0.9990 0.0007
0.0000 0.9972 0.0028
0.0000 0.9999 0.0001
0.0000 0.9950 0.0050
0.0000 1.0000 0.0000
0.0001 0.9999 0.0000
0.0000 0.9999 0.0001
0.0001 0.9996 0.0002
0.0001 0.9987 0.0012
0.0001 0.9999 0.0000
0.0013 0.9976 0.0011
0.0000 0.9994 0.0006
0.0000 0.9999 0.0000
0.0000 0.9908 0.0092
0.0000 0.9998 0.0001
0.0030 0.9964 0.0006
0.0001 0.9981 0.0018
0.0001 0.9550 0.0448
0.0000 0.9909 0.0091
0.0000 1.0000 0.0000
0.0001 0.9999 0.0000
0.0003 0.9997 0.0000
0.0000 1.0000 0.0000
0.0014 0.9985 0.0002
0.0000 0.9994 0.0006
0.0000 0.9933 0.0067
0.0000 0.9991 0.0008
0.0000 0.9970 0.0030
0.0000 0.9560 0.0440
0.0000 0.9959 0.0041
0.0000 0.9991 0.0009
0.0000 1.0000 0.0000
0.0002 0.9947 0.0051
0.0090 0.2538 0.7372
0.0001 0.9998 0.0001
0.0003 0.9995 0.0002
0.0001 0.9932 0.0067
0.0003 0.9992 0.0005
0.0002 0.9983 0.0015
0.0017 0.9968 0.0015
0.0006 0.1388 0.8605
0.0001 0.4226 0.5772
0.0000 1.0000 0.0000
0.0000 0.9999 0.0001
0.0000 0.9958 0.0041
0.0001 0.9379 0.0619
0.0001 0.9999 0.0000
0.0000 0.9999 0.0000
0.0001 0.9996 0.0003
0.0000 0.9997 0.0003
0.0003 0.9992 0.0005
0.0160 0.9812 0.0028
0.0119 0.6003 0.3879
0.0016 0.9842 0.0143
0.0067 0.9676 0.0257
0.0003 0.9984 0.0014
0.0000 0.9937 0.0063
0.0000 1.0000 0.0000
0.0000 0.9998 0.0002
0.0000 1.0000 0.0000
0.0035 0.9711 0.0254
0.0016 0.4679 0.5305
0.0001 0.9980 0.0019
0.0000 0.9929 0.0071
0.0000 0.9838 0.0161
0.0067 0.9890 0.0042
0.0009 0.9894 0.0097
0.0016 0.9968 0.0016
0.0001 0.9983 0.0016
0.0010 0.9973 0.0016
0.0010 0.9837 0.0153
0.0016 0.9978 0.0006
0.0155 0.8999 0.0846
0.0042 0.9863 0.0095
0.0005 0.9991 0.0004
0.0000 0.9985 0.0015
0.0000 1.0000 0.0000
0.0000 0.9996 0.0004
0.0000 1.0000 0.0000
0.0000 0.9999 0.0001
0.0174 0.9768 0.0059
0.0001 0.9966 0.0033
0.0000 0.9997 0.0003
0.0000 1.0000 0.0000
0.0000 0.9999 0.0001
0.0000 0.2583 0.7417
0.0000 0.9508 0.0492
0.0005 0.9964 0.0031
0.0011 0.9927 0.0062
0.0000 0.9999 0.0001
0.0000 0.9992 0.0007
0.0002 0.9995 0.0003
0.0000 0.9981 0.0019
0.0000 0.9998 0.0002
0.0001 0.9830 0.0169
0.0006 0.9962 0.0032
0.0001 0.8734 0.1265
0.0000 0.9981 0.0019
0.0000 1.0000 0.0000
0.0000 1.0000 0.0000
0.0000 1.0000 0.0000
0.0000 0.9999 0.0001
0.0000 1.0000 0.0000
0.0003 0.9997 0.0000
0.0013 0.9766 0.0221
0.0000 0.9999 0.0000
0.0000 1.0000 0.0000
0.0000 1.0000 0.0000
0.0000 0.9937 0.0063
0.0000 1.0000 0.0000
0.0002 0.9964 0.0035
0.0027 0.9646 0.0328
0.0000 0.9973 0.0027
0.0000 0.9985 0.0014
0.0000 0.9998 0.0002
0.0033 0.9942 0.0025
0.0002 0.9985 0.0013
0.0000 1.0000 0.0000
0.0000 1.0000 0.0000
0.0002 0.9997 0.0001
0.0021 0.9975 0.0004
0.0000 0.9828 0.0172
0.0000 1.0000 0.0000
0.0026 0.9939 0.0036
0.0000 0.9998 0.0002
0.0001 0.9971 0.0028
0.0000 0.9778 0.0221
0.0099 0.9898 0.0003
0.0027 0.9960 0.0013
0.0417 0.9487 0.0096
0.0000 0.9952 0.0048
0.0001 0.9977 0.0021
0.0000 0.9980 0.0020
0.0003 0.4761 0.5237
0.0001 0.9999 0.0000
0.0000 0.9996 0.0003
0.0025 0.9967 0.0008
0.0000 0.9993 0.0006
0.0024 0.9768 0.0208
0.0001 0.9995 0.0004
0.0000 0.5432 0.4568
0.0005 0.9206 0.0789
0.0008 0.9991 0.0002
0.0008 0.9819 0.0173
0.0000 0.9996 0.0004
0.0003 0.9837 0.0160
0.0003 0.9453 0.0543
0.0000 0.9937 0.0063
0.0000 0.9999 0.0001
0.0000 0.9998 0.0002
0.0057 0.9886 0.0057
0.0002 0.4379 0.5619
0.0000 1.0000 0.0000
0.0000 0.6639 0.3361
0.0007 0.9993 0.0001
0.0000 0.9717 0.0283
0.0001 0.9997 0.0002
0.0000 0.9990 0.0010
0.0000 0.9980 0.0020
0.0000 0.8249 0.1751
0.0005 0.9082 0.0914
0.0000 0.9999 0.0001
0.0001 0.9968 0.0031
0.0027 0.9939 0.0033
0.0000 0.9998 0.0002
0.0000 0.9997 0.0003
0.0000 0.9878 0.0121
0.0001 0.9953 0.0046
0.0001 0.9304 0.0695
0.0002 0.9831 0.0167
0.0000 0.9868 0.0131
0.0021 0.8618 0.1361
0.0000 0.9925 0.0074
0.0000 0.9301 0.0699
0.0000 0.9943 0.0056
0.0001 0.9830 0.0169
0.0001 0.9201 0.0797
0.0001 0.9999 0.0000
0.0000 0.9999 0.0001
0.0000 0.9991 0.0009
0.0001 0.9872 0.0127
0.0004 0.9960 0.0036
0.0003 0.9863 0.0134
0.0001 0.9976 0.0024
0.0007 0.5350 0.4643
0.0000 0.9999 0.0001
0.0028 0.9937 0.0035
0.0000 0.9999 0.0001
0.0009 0.9965 0.0026
0.0855 0.5537 0.3609
0.5875 0.2883 0.1241
0.1533 0.4911 0.3556
0.0000 0.6525 0.3475
0.0000 0.8204 0.1796
0.0001 0.9344 0.0655
0.0001 0.9918 0.0081
0.0000 0.9993 0.0007
0.0009 0.9129 0.0863
0.0006 0.8647 0.1346
0.0031 0.9358 0.0612
0.0024 0.9913 0.0063
0.0000 0.9978 0.0022
0.0000 0.9999 0.0001
0.0000 0.9802 0.0198
0.0000 0.2389 0.7611
0.0000 0.9554 0.0446
0.0000 0.9904 0.0096
0.0000 0.9960 0.0039
0.0000 0.9990 0.0009
0.0003 0.9963 0.0034
0.0025 0.9452 0.0523
0.0000 1.0000 0.0000
0.0000 0.9839 0.0161
0.0239 0.9158 0.0602
0.0044 0.8817 0.1138
0.0000 0.9121 0.0879
0.0000 0.9999 0.0001
0.0000 0.9404 0.0596
0.0029 0.9960 0.0011
0.0000 0.9955 0.0044
0.0246 0.9678 0.0076
0.0000 0.9690 0.0310
0.0000 0.9986 0.0014
0.0004 0.9837 0.0159
0.0001 0.9780 0.0219
0.0000 0.8425 0.1574
0.0000 0.9992 0.0008
0.0000 0.9418 0.0582
0.0003 0.9772 0.0225
0.0000 0.7350 0.2650
0.0003 0.9906 0.0091
0.0000 0.9981 0.0018
0.0000 0.9999 0.0001
0.0000 0.9804 0.0196
0.0006 0.4845 0.5149
0.0042 0.9925 0.0033
0.0007 0.9991 0.0002
0.0001 0.9696 0.0303
0.0002 0.9961 0.0038
0.0000 0.9945 0.0055
0.0024 0.0181 0.9795
0.0000 0.9961 0.0039
0.0000 0.9697 0.0303
0.0073 0.9867 0.0060
0.0003 0.9961 0.0036
0.0008 0.9956 0.0036
0.0000 0.9861 0.0139
0.0001 0.7601 0.2399
0.0002 0.9439 0.0559
0.0000 0.9986 0.0014
0.0001 0.9965 0.0035
0.0022 0.8399 0.1578
0.0000 0.9589 0.0411
0.0000 0.9926 0.0074
0.0000 0.9980 0.0020
0.0000 0.9993 0.0007
0.0000 0.9990 0.0009
0.0001 0.9503 0.0497
0.0002 0.9813 0.0186
0.0000 0.9997 0.0003
0.0000 0.9107 0.0893
0.0001 0.9840 0.0159
0.0001 0.9929 0.0070
0.0000 0.9974 0.0026
0.0000 0.9962 0.0037
0.0000 0.0275 0.9725
0.0000 0.9989 0.0011
0.0000 0.9241 0.0759
0.0018 0.9980 0.0002
0.0001 0.8918 0.1082
0.0000 0.8532 0.1467
0.0000 0.9551 0.0449
0.0000 0.9976 0.0024
0.0000 0.9987 0.0013
0.0000 0.0361 0.9639
0.0000 0.9549 0.0451
0.0000 0.9883 0.0117
0.0000 0.9999 0.0000
0.0001 0.9685 0.0314
0.0000 0.9994 0.0006
0.0000 0.0551 0.9449
0.0005 0.9809 0.0186
0.0000 0.9995 0.0005
0.0000 0.9624 0.0376
0.0010 0.9360 0.0630
0.0051 0.9044 0.0905
0.0002 0.9981 0.0017
0.0002 0.9761 0.0238
0.0001 0.5625 0.4374
0.0004 0.9985 0.0012
0.0000 0.9997 0.0003
0.0000 0.9913 0.0087
0.0000 0.9997 0.0003
0.0070 0.9795 0.0136
0.0001 0.9604 0.0395
0.0000 0.9927 0.0073
0.0005 0.9941 0.0054
0.0001 0.9962 0.0037
0.0001 0.9787 0.0212
0.0000 0.7305 0.2695
0.0001 0.4300 0.5700
0.0000 0.9999 0.0001
0.0044 0.0125 0.9831
0.0003 0.8844 0.1152
0.0015 0.9942 0.0043
0.0007 0.5505 0.4487
0.0000 0.9906 0.0094
0.0001 0.9932 0.0067
0.0000 0.9104 0.0896
0.0003 0.0061 0.9936
0.0004 0.9995 0.0002
0.0001 0.9999 0.0000
0.0061 0.9827 0.0112
0.0041 0.4546 0.5414
0.0001 0.9994 0.0005
0.0016 0.8626 0.1358
0.0000 0.9692 0.0308
0.0000 0.9915 0.0085
0.0000 1.0000 0.0000
0.0001 0.6361 0.3638
0.0073 0.7709 0.2218
0.0007 0.9767 0.0226
0.0076 0.9719 0.0205
0.0000 0.9984 0.0016
0.0010 0.9967 0.0022
0.0023 0.9198 0.0780
0.0005 0.9972 0.0023
0.0002 0.9942 0.0056
0.0101 0.9891 0.0008
0.0008 0.8902 0.1090
0.0001 0.9994 0.0005
0.0001 0.9999 0.0000
0.0001 0.9998 0.0001
0.0005 0.9387 0.0609
0.0122 0.9648 0.0229
0.0051 0.9914 0.0036
0.0137 0.9822 0.0042
0.0233 0.9440 0.0327
0.0147 0.9834 0.0020
0.0005 0.9982 0.0014
[truncated: 2,982 more rows]

## Sheet: 4 class scores
0.9999 0.0000 0.0000 0.0001
0.9943 0.0001 0.0001 0.0056
0.9554 0.0000 0.0001 0.0445
0.9993 0.0000 0.0001 0.0005
0.9998 0.0000 0.0000 0.0002
0.9996 0.0000 0.0000 0.0003
0.9960 0.0003 0.0015 0.0022
1.0000 0.0000 0.0000 0.0000
0.9998 0.0001 0.0001 0.0000
0.9984 0.0001 0.0014 0.0001
0.9999 0.0000 0.0001 0.0000
0.9947 0.0004 0.0047 0.0002
0.9925 0.0002 0.0072 0.0000
0.9981 0.0002 0.0014 0.0003
0.9935 0.0004 0.0019 0.0042
0.9998 0.0002 0.0000 0.0000
0.9975 0.0001 0.0023 0.0000
1.0000 0.0000 0.0000 0.0000
0.9995 0.0000 0.0003 0.0002
0.9971 0.0002 0.0027 0.0001
0.9998 0.0000 0.0000 0.0002
0.9749 0.0206 0.0021 0.0024
0.9736 0.0001 0.0262 0.0001
0.9996 0.0004 0.0000 0.0000
0.4969 0.3294 0.0002 0.1735
0.9992 0.0004 0.0001 0.0003
0.9992 0.0005 0.0000 0.0002
0.9997 0.0002 0.0000 0.0001
0.9948 0.0010 0.0011 0.0031
0.9995 0.0002 0.0000 0.0003
0.9995 0.0000 0.0000 0.0005
0.9969 0.0001 0.0000 0.0030
0.9999 0.0000 0.0000 0.0000
0.9993 0.0004 0.0001 0.0003
1.0000 0.0000 0.0000 0.0000
0.9991 0.0005 0.0000 0.0004
0.9920 0.0008 0.0002 0.0070
0.9997 0.0001 0.0000 0.0002
0.9827 0.0022 0.0004 0.0147
0.9980 0.0013 0.0000 0.0006
0.9999 0.0000 0.0000 0.0001
1.0000 0.0000 0.0000 0.0000
0.9987 0.0000 0.0000 0.0013
0.9994 0.0000 0.0000 0.0006
1.0000 0.0000 0.0000 0.0000
0.9999 0.0000 0.0000 0.0000
1.0000 0.0000 0.0000 0.0000
0.9995 0.0000 0.0004 0.0001
0.9977 0.0014 0.0004 0.0006
0.9952 0.0041 0.0007 0.0000
0.9998 0.0000 0.0001 0.0001
0.9995 0.0002 0.0000 0.0003
0.9998 0.0000 0.0001 0.0001
0.9999 0.0001 0.0000 0.0001
0.9999 0.0000 0.0000 0.0001
0.9944 0.0050 0.0000 0.0006
0.9974 0.0000 0.0001 0.0025
0.9988 0.0010 0.0000 0.0002
0.9992 0.0000 0.0004 0.0003
0.9999 0.0000 0.0000 0.0001
1.0000 0.0000 0.0000 0.0000
0.9938 0.0001 0.0005 0.0057
1.0000 0.0000 0.0000 0.0000
1.0000 0.0000 0.0000 0.0000
0.9959 0.0000 0.0010 0.0030
1.0000 0.0000 0.0000 0.0000
0.9999 0.0000 0.0000 0.0000
0.9999 0.0000 0.0000 0.0000
0.9999 0.0000 0.0000 0.0000
0.9999 0.0000 0.0000 0.0001
1.0000 0.0000 0.0000 0.0000
0.9993 0.0004 0.0001 0.0002
1.0000 0.0000 0.0000 0.0000
0.9999 0.0000 0.0000 0.0001
0.9982 0.0002 0.0005 0.0011
0.9999 0.0000 0.0000 0.0000
0.9999 0.0000 0.0001 0.0000
0.9998 0.0001 0.0000 0.0002
0.9985 0.0002 0.0010 0.0003
0.9998 0.0001 0.0000 0.0000
0.9999 0.0001 0.0000 0.0000
0.9997 0.0000 0.0000 0.0003
0.9999 0.0000 0.0000 0.0001
1.0000 0.0000 0.0000 0.0000
0.9990 0.0000 0.0000 0.0009
0.9997 0.0001 0.0001 0.0001
0.9998 0.0001 0.0001 0.0000
0.9999 0.0000 0.0000 0.0001
0.9990 0.0002 0.0008 0.0001
0.9945 0.0001 0.0053 0.0001
0.9984 0.0008 0.0006 0.0003
0.9991 0.0001 0.0004 0.0003
0.9987 0.0000 0.0002 0.0010
1.0000 0.0000 0.0000 0.0000
0.9987 0.0002 0.0001 0.0010
0.9999 0.0000 0.0000 0.0001
1.0000 0.0000 0.0000 0.0000
1.0000 0.0000 0.0000 0.0000
0.9991 0.0003 0.0002 0.0004
0.9933 0.0001 0.0001 0.0065
0.9997 0.0002 0.0001 0.0000
0.9996 0.0001 0.0001 0.0002
0.9998 0.0000 0.0000 0.0002
1.0000 0.0000 0.0000 0.0000
1.0000 0.0000 0.0000 0.0000
1.0000 0.0000 0.0000 0.0000
1.0000 0.0000 0.0000 0.0000
0.9991 0.0003 0.0002 0.0004
0.9961 0.0004 0.0000 0.0034
0.9929 0.0005 0.0002 0.0064
1.0000 0.0000 0.0000 0.0000
0.9997 0.0000 0.0000 0.0002
0.9999 0.0001 0.0000 0.0001
0.9981 0.0001 0.0000 0.0018
1.0000 0.0000 0.0000 0.0000
0.9994 0.0000 0.0002 0.0004
1.0000 0.0000 0.0000 0.0000
0.9998 0.0002 0.0000 0.0001
1.0000 0.0000 0.0000 0.0000
0.9998 0.0000 0.0000 0.0002
0.9812 0.0001 0.0000 0.0186
0.9990 0.0007 0.0000 0.0003
1.0000 0.0000 0.0000 0.0000
0.9999 0.0000 0.0000 0.0000
0.9998 0.0000 0.0000 0.0002
1.0000 0.0000 0.0000 0.0000
1.0000 0.0000 0.0000 0.0000
0.9996 0.0000 0.0000 0.0003
1.0000 0.0000 0.0000 0.0000
0.9989 0.0003 0.0000 0.0008
0.9996 0.0003 0.0000 0.0001
1.0000 0.0000 0.0000 0.0000
0.9998 0.0000 0.0000 0.0002
1.0000 0.0000 0.0000 0.0000
1.0000 0.0000 0.0000 0.0000
1.0000 0.0000 0.0000 0.0000
1.0000 0.0000 0.0000 0.0000
1.0000 0.0000 0.0000 0.0000
1.0000 0.0000 0.0000 0.0000
1.0000 0.0000 0.0000 0.0000
1.0000 0.0000 0.0000 0.0000
1.0000 0.0000 0.0000 0.0000
0.9982 0.0013 0.0001 0.0004
0.9973 0.0001 0.0001 0.0025
0.9968 0.0009 0.0004 0.0018
0.9998 0.0000 0.0000 0.0002
1.0000 0.0000 0.0000 0.0000
1.0000 0.0000 0.0000 0.0000
0.9999 0.0000 0.0000 0.0001
0.9999 0.0000 0.0000 0.0000
0.9999 0.0000 0.0000 0.0001
0.9999 0.0000 0.0000 0.0001
0.9998 0.0000 0.0000 0.0002
0.9999 0.0001 0.0000 0.0000
1.0000 0.0000 0.0000 0.0000
1.0000 0.0000 0.0000 0.0000
0.9992 0.0000 0.0000 0.0008
1.0000 0.0000 0.0000 0.0000
1.0000 0.0000 0.0000 0.0000
0.9987 0.0001 0.0000 0.0012
0.9999 0.0000 0.0000 0.0001
0.9960 0.0000 0.0000 0.0040
0.9999 0.0000 0.0000 0.0001
0.9989 0.0000 0.0000 0.0011
0.9999 0.0000 0.0000 0.0001
1.0000 0.0000 0.0000 0.0000
0.9999 0.0001 0.0000 0.0000
0.9990 0.0000 0.0000 0.0010
0.9959 0.0000 0.0013 0.0027
1.0000 0.0000 0.0000 0.0000
0.9997 0.0001 0.0000 0.0001
0.9997 0.0003 0.0000 0.0000
0.9998 0.0000 0.0000 0.0002
0.9892 0.0000 0.0000 0.0108
0.9998 0.0001 0.0000 0.0002
0.9997 0.0000 0.0000 0.0003
0.9999 0.0000 0.0000 0.0001
0.9914 0.0000 0.0000 0.0085
1.0000 0.0000 0.0000 0.0000
0.9999 0.0000 0.0000 0.0001
1.0000 0.0000 0.0000 0.0000
1.0000 0.0000 0.0000 0.0000
1.0000 0.0000 0.0000 0.0000
0.9999 0.0000 0.0000 0.0001
0.9970 0.0008 0.0000 0.0023
0.9983 0.0002 0.0000 0.0015
1.0000 0.0000 0.0000 0.0000
0.9994 0.0002 0.0000 0.0004
1.0000 0.0000 0.0000 0.0000
0.9999 0.0000 0.0000 0.0001
0.9951 0.0000 0.0000 0.0049
0.9977 0.0000 0.0000 0.0023
0.9999 0.0000 0.0000 0.0001
0.9998 0.0000 0.0000 0.0002
0.9996 0.0000 0.0000 0.0004
1.0000 0.0000 0.0000 0.0000
1.0000 0.0000 0.0000 0.0000
1.0000 0.0000 0.0000 0.0000
0.9951 0.0000 0.0000 0.0049
1.0000 0.0000 0.0000 0.0000
0.9999 0.0000 0.0000 0.0000
0.9998 0.0001 0.0000 0.0000
0.9998 0.0002 0.0000 0.0000
0.9732 0.0015 0.0025 0.0227
1.0000 0.0000 0.0000 0.0000
0.9997 0.0000 0.0000 0.0003
0.9879 0.0000 0.0001 0.0120
0.9999 0.0000 0.0000 0.0001
0.9998 0.0001 0.0001 0.0000
0.9999 0.0000 0.0000 0.0001
0.9888 0.0001 0.0000 0.0111
0.9981 0.0000 0.0009 0.0010
0.9985 0.0000 0.0000 0.0014
1.0000 0.0000 0.0000 0.0000
0.9997 0.0000 0.0000 0.0003
0.9979 0.0015 0.0000 0.0006
0.9994 0.0001 0.0001 0.0004
0.9995 0.0001 0.0000 0.0004
0.9998 0.0001 0.0000 0.0001
0.9979 0.0000 0.0021 0.0000
0.9999 0.0000 0.0001 0.0000
0.9997 0.0000 0.0000 0.0003
1.0000 0.0000 0.0000 0.0000
1.0000 0.0000 0.0000 0.0000
0.9947 0.0001 0.0052 0.0000
0.9971 0.0002 0.0018 0.0009
0.9999 0.0000 0.0001 0.0000
0.9996 0.0000 0.0003 0.0001
0.9995 0.0000 0.0000 0.0005
0.9648 0.0006 0.0010 0.0336
0.9466 0.0061 0.0303 0.0171
0.9648 0.0011 0.0328 0.0013
0.9996 0.0000 0.0000 0.0004
0.9999 0.0000 0.0000 0.0001
0.9496 0.0002 0.0052 0.0449
1.0000 0.0000 0.0000 0.0000
1.0000 0.0000 0.0000 0.0000
0.9936 0.0009 0.0049 0.0006
0.9999 0.0000 0.0000 0.0000
0.9999 0.0000 0.0000 0.0000
1.0000 0.0000 0.0000 0.0000
0.9957 0.0000 0.0000 0.0042
1.0000 0.0000 0.0000 0.0000
1.0000 0.0000 0.0000 0.0000
1.0000 0.0000 0.0000 0.0000
1.0000 0.0000 0.0000 0.0000
1.0000 0.0000 0.0000 0.0000
0.9920 0.0012 0.0001 0.0066
0.9955 0.0000 0.0000 0.0044
1.0000 0.0000 0.0000 0.0000
1.0000 0.0000 0.0000 0.0000
1.0000 0.0000 0.0000 0.0000
0.9966 0.0026 0.0000 0.0007
0.9989 0.0000 0.0000 0.0010
1.0000 0.0000 0.0000 0.0000
0.9986 0.0003 0.0000 0.0011
1.0000 0.0000 0.0000 0.0000
0.9994 0.0001 0.0000 0.0005
0.9998 0.0001 0.0000 0.0000
1.0000 0.0000 0.0000 0.0000
0.9998 0.0001 0.0000 0.0001
1.0000 0.0000 0.0000 0.0000
0.9999 0.0000 0.0000 0.0001
0.9999 0.0001 0.0000 0.0000
0.9997 0.0000 0.0000 0.0003
1.0000 0.0000 0.0000 0.0000
0.9995 0.0000 0.0000 0.0004
0.9999 0.0000 0.0000 0.0001
0.9999 0.0000 0.0000 0.0001
0.9999 0.0000 0.0000 0.0001
1.0000 0.0000 0.0000 0.0000
0.9999 0.0000 0.0000 0.0000
0.9999 0.0000 0.0000 0.0000
1.0000 0.0000 0.0000 0.0000
0.9993 0.0001 0.0000 0.0005
0.9984 0.0003 0.0002 0.0012
0.9882 0.0008 0.0007 0.0103
1.0000 0.0000 0.0000 0.0000
0.9996 0.0001 0.0001 0.0003
0.8803 0.0743 0.0049 0.0406
0.9995 0.0003 0.0000 0.0001
0.9982 0.0003 0.0002 0.0013
0.9999 0.0001 0.0000 0.0000
0.9998 0.0000 0.0000 0.0002
1.0000 0.0000 0.0000 0.0000
0.9944 0.0041 0.0007 0.0008
0.9997 0.0003 0.0000 0.0000
0.9997 0.0000 0.0000 0.0003
1.0000 0.0000 0.0000 0.0000
1.0000 0.0000 0.0000 0.0000
1.0000 0.0000 0.0000 0.0000
1.0000 0.0000 0.0000 0.0000
0.9985 0.0001 0.0000 0.0014
0.9986 0.0001 0.0000 0.0014
0.9999 0.0000 0.0000 0.0000
1.0000 0.0000 0.0000 0.0000
1.0000 0.0000 0.0000 0.0000
0.9998 0.0001 0.0000 0.0002
0.9999 0.0000 0.0000 0.0000
0.9999 0.0000 0.0000 0.0001
0.9885 0.0002 0.0003 0.0110
0.9999 0.0000 0.0000 0.0000
0.9999 0.0000 0.0000 0.0000
0.9982 0.0000 0.0000 0.0017
0.9987 0.0001 0.0000 0.0011
0.9986 0.0000 0.0000 0.0014
0.9999 0.0000 0.0000 0.0001
1.0000 0.0000 0.0000 0.0000
0.9938 0.0004 0.0002 0.0056
0.9995 0.0001 0.0000 0.0004
0.9999 0.0000 0.0000 0.0001
0.9976 0.0005 0.0000 0.0020
1.0000 0.0000 0.0000 0.0000
0.9874 0.0001 0.0001 0.0124
0.9985 0.0001 0.0001 0.0013
0.9933 0.0000 0.0058 0.0008
1.0000 0.0000 0.0000 0.0000
0.9993 0.0000 0.0007 0.0000
0.9991 0.0005 0.0001 0.0003
0.9969 0.0001 0.0014 0.0015
0.9998 0.0000 0.0000 0.0002
1.0000 0.0000 0.0000 0.0000
0.9998 0.0000 0.0000 0.0002
0.9990 0.0001 0.0000 0.0009
1.0000 0.0000 0.0000 0.0000
0.9961 0.0000 0.0000 0.0039
0.9993 0.0000 0.0000 0.0007
0.9997 0.0000 0.0000 0.0003
0.9988 0.0000 0.0000 0.0012
0.9935 0.0006 0.0001 0.0058
0.9959 0.0004 0.0005 0.0033
0.9992 0.0002 0.0000 0.0006
1.0000 0.0000 0.0000 0.0000
0.9999 0.0000 0.0001 0.0000
0.9886 0.0088 0.0025 0.0001
0.9960 0.0017 0.0010 0.0013
0.9862 0.0001 0.0009 0.0127
1.0000 0.0000 0.0000 0.0000
1.0000 0.0000 0.0000 0.0000
0.9998 0.0000 0.0000 0.0001
1.0000 0.0000 0.0000 0.0000
1.0000 0.0000 0.0000 0.0000
0.9999 0.0000 0.0000 0.0001
0.9980 0.0000 0.0000 0.0019
0.9809 0.0001 0.0000 0.0190
0.9963 0.0004 0.0002 0.0030
0.9997 0.0000 0.0000 0.0002
0.9999 0.0001 0.0000 0.0000
1.0000 0.0000 0.0000 0.0000
0.9999 0.0000 0.0000 0.0000
0.9996 0.0000 0.0000 0.0004
1.0000 0.0000 0.0000 0.0000
0.9999 0.0001 0.0000 0.0000
1.0000 0.0000 0.0000 0.0000
1.0000 0.0000 0.0000 0.0000
0.9723 0.0144 0.0004 0.0129
1.0000 0.0000 0.0000 0.0000
0.9992 0.0000 0.0000 0.0008
0.9999 0.0001 0.0000 0.0000
1.0000 0.0000 0.0000 0.0000
0.9995 0.0000 0.0000 0.0004
1.0000 0.0000 0.0000 0.0000
0.9999 0.0000 0.0000 0.0001
0.9948 0.0001 0.0005 0.0046
0.9990 0.0000 0.0001 0.0009
0.9959 0.0000 0.0000 0.0041
0.9975 0.0007 0.0007 0.0010
1.0000 0.0000 0.0000 0.0000
0.9997 0.0000 0.0000 0.0003
1.0000 0.0000 0.0000 0.0000
0.9922 0.0000 0.0000 0.0077
0.9904 0.0002 0.0092 0.0002
1.0000 0.0000 0.0000 0.0000
0.9997 0.0000 0.0002 0.0001
0.9999 0.0000 0.0000 0.0000
0.9999 0.0000 0.0000 0.0000
1.0000 0.0000 0.0000 0.0000
1.0000 0.0000 0.0000 0.0000
0.9995 0.0004 0.0000 0.0001
1.0000 0.0000 0.0000 0.0000
0.9999 0.0000 0.0000 0.0001
1.0000 0.0000 0.0000 0.0000
0.9999 0.0000 0.0000 0.0000
1.0000 0.0000 0.0000 0.0000
1.0000 0.0000 0.0000 0.0000
1.0000 0.0000 0.0000 0.0000
0.9999 0.0000 0.0000 0.0000
0.9999 0.0000 0.0000 0.0000
0.9996 0.0000 0.0000 0.0004
0.9999 0.0001 0.0000 0.0000
0.9282 0.0011 0.0002 0.0704
0.9999 0.0000 0.0001 0.0000
0.9995 0.0004 0.0000 0.0001
0.9996 0.0000 0.0000 0.0004
0.9999 0.0001 0.0000 0.0000
1.0000 0.0000 0.0000 0.0000
0.9999 0.0000 0.0000 0.0001
1.0000 0.0000 0.0000 0.0000
1.0000 0.0000 0.0000 0.0000
1.0000 0.0000 0.0000 0.0000
1.0000 0.0000 0.0000 0.0000
1.0000 0.0000 0.0000 0.0000
1.0000 0.0000 0.0000 0.0000
1.0000 0.0000 0.0000 0.0000
1.0000 0.0000 0.0000 0.0000
0.9996 0.0000 0.0002 0.0002
0.9999 0.0000 0.0000 0.0000
0.9998 0.0000 0.0000 0.0002
1.0000 0.0000 0.0000 0.0000
0.9913 0.0002 0.0000 0.0085
0.9997 0.0000 0.0001 0.0002
0.9999 0.0000 0.0000 0.0000
1.0000 0.0000 0.0000 0.0000
0.9999 0.0000 0.0000 0.0001
0.9998 0.0000 0.0000 0.0002
0.9930 0.0031 0.0013 0.0027
0.9835 0.0084 0.0016 0.0064
0.9987 0.0008 0.0001 0.0005
0.9991 0.0001 0.0000 0.0008
0.9942 0.0006 0.0022 0.0029
0.9935 0.0039 0.0013 0.0014
0.9758 0.0003 0.0025 0.0214
0.9957 0.0001 0.0000 0.0041
0.9942 0.0002 0.0004 0.0052
0.5703 0.0001 0.4159 0.0137
0.9991 0.0000 0.0000 0.0008
0.9731 0.0000 0.0058 0.0210
0.9996 0.0000 0.0002 0.0002
1.0000 0.0000 0.0000 0.0000
0.9999 0.0001 0.0000 0.0000
0.9978 0.0009 0.0001 0.0012
0.9999 0.0000 0.0000 0.0000
0.9785 0.0002 0.0207 0.0006
0.9992 0.0000 0.0000 0.0007
0.9997 0.0000 0.0000 0.0003
0.9991 0.0003 0.0005 0.0000
0.9998 0.0002 0.0000 0.0000
0.9996 0.0002 0.0001 0.0000
1.0000 0.0000 0.0000 0.0000
0.9974 0.0005 0.0002 0.0019
1.0000 0.0000 0.0000 0.0000
0.9995 0.0002 0.0003 0.0000
0.4498 0.0002 0.0060 0.5440
0.9999 0.0001 0.0001 0.0000
1.0000 0.0000 0.0000 0.0000
0.9998 0.0001 0.0000 0.0001
0.9987 0.0002 0.0000 0.0011
0.9998 0.0001 0.0000 0.0001
1.0000 0.0000 0.0000 0.0000
1.0000 0.0000 0.0000 0.0000
1.0000 0.0000 0.0000 0.0000
1.0000 0.0000 0.0000 0.0000
0.9996 0.0000 0.0000 0.0003
0.9999 0.0000 0.0000 0.0001
0.9967 0.0001 0.0001 0.0031
0.9996 0.0001 0.0002 0.0001
0.9999 0.0000 0.0000 0.0001
1.0000 0.0000 0.0000 0.0000
0.9984 0.0001 0.0013 0.0001
0.9997 0.0000 0.0000 0.0003
0.9999 0.0000 0.0000 0.0001
0.9982 0.0005 0.0007 0.0006
0.9999 0.0000 0.0000 0.0001
0.9994 0.0000 0.0006 0.0000
0.9916 0.0034 0.0001 0.0049
0.9979 0.0002 0.0016 0.0003
0.9952 0.0029 0.0006 0.0013
0.9991 0.0000 0.0000 0.0009
0.9913 0.0003 0.0003 0.0081
0.9998 0.0000 0.0000 0.0001
0.9958 0.0001 0.0003 0.0039
0.9998 0.0000 0.0000 0.0001
0.9999 0.0000 0.0000 0.0000
1.0000 0.0000 0.0000 0.0000
1.0000 0.0000 0.0000 0.0000
1.0000 0.0000 0.0000 0.0000
0.9982 0.0003 0.0000 0.0014
1.0000 0.0000 0.0000 0.0000
1.0000 0.0000 0.0000 0.0000
0.9978 0.0008 0.0008 0.0006
0.9999 0.0000 0.0000 0.0001
0.9996 0.0000 0.0001 0.0003
1.0000 0.0000 0.0000 0.0000
0.9999 0.0000 0.0001 0.0000
0.9997 0.0000 0.0000 0.0002
1.0000 0.0000 0.0000 0.0000
0.9979 0.0001 0.0000 0.0020
0.9919 0.0000 0.0003 0.0077
0.9997 0.0000 0.0000 0.0002
0.9997 0.0000 0.0002 0.0002
0.9989 0.0000 0.0000 0.0011
0.9999 0.0000 0.0000 0.0001
1.0000 0.0000 0.0000 0.0000
0.9997 0.0000 0.0000 0.0003
0.9979 0.0000 0.0000 0.0021
0.9999 0.0000 0.0000 0.0001
0.9996 0.0002 0.0000 0.0002
0.9999 0.0000 0.0000 0.0001
1.0000 0.0000 0.0000 0.0000
0.9981 0.0010 0.0001 0.0009
1.0000 0.0000 0.0000 0.0000
1.0000 0.0000 0.0000 0.0000
1.0000 0.0000 0.0000 0.0000
0.9992 0.0000 0.0000 0.0008
0.9999 0.0001 0.0000 0.0000
0.9999 0.0000 0.0000 0.0000
1.0000 0.0000 0.0000 0.0000
0.9998 0.0000 0.0001 0.0000
0.9999 0.0000 0.0000 0.0000
0.9993 0.0001 0.0003 0.0004
1.0000 0.0000 0.0000 0.0000
0.9999 0.0000 0.0000 0.0001
1.0000 0.0000 0.0000 0.0000
0.9990 0.0002 0.0003 0.0004
0.9997 0.0001 0.0000 0.0003
0.9997 0.0000 0.0000 0.0003
0.9998 0.0000 0.0001 0.0001
0.9991 0.0000 0.0005 0.0004
1.0000 0.0000 0.0000 0.0000
0.9994 0.0000 0.0000 0.0005
1.0000 0.0000 0.0000 0.0000
0.9926 0.0003 0.0000 0.0071
0.9992 0.0000 0.0000 0.0008
1.0000 0.0000 0.0000 0.0000
0.9989 0.0002 0.0001 0.0008
0.9999 0.0000 0.0000 0.0001
0.9995 0.0000 0.0000 0.0005
1.0000 0.0000 0.0000 0.0000
0.9037 0.0199 0.0005 0.0760
1.0000 0.0000 0.0000 0.0000
0.9997 0.0000 0.0001 0.0001
1.0000 0.0000 0.0000 0.0000
0.9999 0.0000 0.0000 0.0001
0.9989 0.0001 0.0000 0.0009
1.0000 0.0000 0.0000 0.0000
0.9993 0.0000 0.0000 0.0007
0.9998 0.0000 0.0000 0.0002
0.9997 0.0000 0.0000 0.0002
0.9998 0.0001 0.0000 0.0001
1.0000 0.0000 0.0000 0.0000
0.9998 0.0001 0.0000 0.0001
0.9962 0.0001 0.0000 0.0038
0.9999 0.0000 0.0000 0.0001
0.9976 0.0011 0.0000 0.0013
0.9999 0.0000 0.0000 0.0000
0.9992 0.0000 0.0000 0.0007
0.9947 0.0001 0.0001 0.0051
0.9942 0.0003 0.0007 0.0048
0.9990 0.0000 0.0000 0.0010
0.9999 0.0000 0.0000 0.0001
0.9998 0.0000 0.0001 0.0001
0.9997 0.0000 0.0000 0.0003
1.0000 0.0000 0.0000 0.0000
0.9750 0.0002 0.0214 0.0034
1.0000 0.0000 0.0000 0.0000
0.9999 0.0000 0.0000 0.0001
0.9996 0.0000 0.0000 0.0003
1.0000 0.0000 0.0000 0.0000
0.9913 0.0001 0.0005 0.0082
0.9980 0.0002 0.0013 0.0004
0.9996 0.0000 0.0001 0.0002
0.9985 0.0001 0.0011 0.0003
1.0000 0.0000 0.0000 0.0000
1.0000 0.0000 0.0000 0.0000
0.9999 0.0000 0.0000 0.0001
1.0000 0.0000 0.0000 0.0000
0.9997 0.0000 0.0000 0.0002
0.9992 0.0006 0.0001 0.0001
0.9951 0.0002 0.0000 0.0047
1.0000 0.0000 0.0000 0.0000
0.9991 0.0000 0.0001 0.0008
0.9983 0.0002 0.0005 0.0010
0.9994 0.0000 0.0000 0.0006
0.9997 0.0000 0.0000 0.0003
0.9995 0.0001 0.0003 0.0001
1.0000 0.0000 0.0000 0.0000
0.9997 0.0000 0.0001 0.0002
0.9998 0.0000 0.0001 0.0000
0.9996 0.0001 0.0001 0.0002
0.9620 0.0334 0.0002 0.0045
0.9927 0.0003 0.0052 0.0017
0.9962 0.0001 0.0023 0.0014
0.9995 0.0000 0.0001 0.0004
0.9497 0.0001 0.0001 0.0500
0.9999 0.0000 0.0000 0.0001
0.9999 0.0000 0.0000 0.0001
0.9995 0.0000 0.0000 0.0005
0.9916 0.0001 0.0002 0.0082
0.9999 0.0000 0.0000 0.0001
1.0000 0.0000 0.0000 0.0000
0.9997 0.0001 0.0001 0.0000
0.9998 0.0000 0.0002 0.0000
0.9962 0.0000 0.0001 0.0036
0.9981 0.0000 0.0016 0.0002
0.9996 0.0000 0.0000 0.0004
0.9977 0.0005 0.0004 0.0014
0.9801 0.0001 0.0006 0.0191
0.9982 0.0002 0.0001 0.0015
0.9995 0.0000 0.0000 0.0005
1.0000 0.0000 0.0000 0.0000
1.0000 0.0000 0.0000 0.0000
0.9999 0.0000 0.0000 0.0001
1.0000 0.0000 0.0000 0.0000
0.9996 0.0001 0.0000 0.0003
0.9999 0.0000 0.0000 0.0001
0.9979 0.0003 0.0002 0.0016
0.9668 0.0003 0.0032 0.0297
0.9948 0.0001 0.0008 0.0043
0.9919 0.0003 0.0000 0.0079
1.0000 0.0000 0.0000 0.0000
0.9987 0.0000 0.0000 0.0012
0.9998 0.0001 0.0000 0.0001
0.9972 0.0001 0.0004 0.0022
1.0000 0.0000 0.0000 0.0000
0.9928 0.0012 0.0004 0.0056
0.9980 0.0001 0.0001 0.0017
0.9994 0.0000 0.0000 0.0006
0.9997 0.0002 0.0000 0.0001
0.9991 0.0000 0.0000 0.0009
0.9976 0.0000 0.0000 0.0024
0.9998 0.0001 0.0000 0.0001
0.9965 0.0004 0.0001 0.0030
0.9957 0.0003 0.0000 0.0039
0.9994 0.0000 0.0000 0.0006
0.9999 0.0000 0.0000 0.0001
0.9995 0.0000 0.0001 0.0003
0.6476 0.0292 0.0919 0.2313
0.9965 0.0001 0.0000 0.0034
0.9997 0.0000 0.0002 0.0000
0.9979 0.0002 0.0001 0.0018
1.0000 0.0000 0.0000 0.0000
0.9974 0.0000 0.0015 0.0011
0.9997 0.0000 0.0000 0.0003
0.9603 0.0004 0.0004 0.0389
0.9994 0.0000 0.0000 0.0005
0.9985 0.0000 0.0012 0.0002
0.9998 0.0000 0.0000 0.0002
0.9612 0.0113 0.0254 0.0022
1.0000 0.0000 0.0000 0.0000
0.9991 0.0000 0.0000 0.0009
0.9832 0.0028 0.0140 0.0000
0.9881 0.0002 0.0111 0.0006
1.0000 0.0000 0.0000 0.0000
0.9999 0.0000 0.0000 0.0001
0.9972 0.0012 0.0002 0.0014
0.9994 0.0003 0.0000 0.0002
0.9995 0.0001 0.0000 0.0004
1.0000 0.0000 0.0000 0.0000
0.9995 0.0002 0.0000 0.0003
0.9997 0.0000 0.0000 0.0002
0.9999 0.0000 0.0000 0.0001
1.0000 0.0000 0.0000 0.0000
0.9999 0.0000 0.0000 0.0000
1.0000 0.0000 0.0000 0.0000
0.9974 0.0000 0.0000 0.0026
0.9627 0.0011 0.0137 0.0224
0.9990 0.0000 0.0002 0.0008
0.9940 0.0002 0.0009 0.0049
0.9950 0.0026 0.0000 0.0024
0.9949 0.0002 0.0001 0.0049
0.9925 0.0037 0.0001 0.0037
0.9932 0.0001 0.0000 0.0067
0.9999 0.0000 0.0000 0.0001
0.9944 0.0002 0.0001 0.0054
0.9997 0.0000 0.0000 0.0002
0.9993 0.0002 0.0000 0.0005
0.9973 0.0000 0.0002 0.0025
0.9996 0.0000 0.0000 0.0004
0.9998 0.0000 0.0000 0.0002
1.0000 0.0000 0.0000 0.0000
0.9980 0.0016 0.0000 0.0004
0.9999 0.0000 0.0000 0.0000
1.0000 0.0000 0.0000 0.0000
0.9993 0.0001 0.0000 0.0006
0.9782 0.0000 0.0011 0.0207
0.9986 0.0000 0.0000 0.0014
0.9990 0.0000 0.0000 0.0009
0.9964 0.0030 0.0006 0.0000
1.0000 0.0000 0.0000 0.0000
1.0000 0.0000 0.0000 0.0000
1.0000 0.0000 0.0000 0.0000
0.9978 0.0003 0.0014 0.0004
0.9970 0.0001 0.0002 0.0027
0.9996 0.0000 0.0000 0.0003
0.9994 0.0001 0.0000 0.0005
0.9994 0.0002 0.0000 0.0004
0.9986 0.0002 0.0007 0.0004
0.9976 0.0000 0.0003 0.0021
1.0000 0.0000 0.0000 0.0000
0.9942 0.0015 0.0041 0.0002
0.9996 0.0003 0.0000 0.0001
0.8782 0.0262 0.0175 0.0781
0.9364 0.0009 0.0024 0.0603
0.9992 0.0007 0.0001 0.0000
0.9985 0.0001 0.0000 0.0014
1.0000 0.0000 0.0000 0.0000
0.9996 0.0000 0.0003 0.0001
1.0000 0.0000 0.0000 0.0000
0.9976 0.0003 0.0004 0.0017
0.9940 0.0001 0.0005 0.0054
0.9844 0.0002 0.0019 0.0134
0.9922 0.0001 0.0019 0.0058
0.9982 0.0001 0.0014 0.0003
0.9994 0.0001 0.0001 0.0004
0.9403 0.0004 0.0592 0.0001
0.9991 0.0000 0.0000 0.0009
0.9977 0.0002 0.0018 0.0003
0.9969 0.0015 0.0016 0.0000
0.9937 0.0006 0.0053 0.0004
0.9477 0.0001 0.0520 0.0001
0.9474 0.0003 0.0415 0.0108
0.9812 0.0014 0.0149 0.0025
0.9974 0.0001 0.0023 0.0002
0.9990 0.0000 0.0006 0.0004
0.9992 0.0000 0.0000 0.0007
0.9996 0.0000 0.0002 0.0002
0.9923 0.0004 0.0073 0.0000
0.9949 0.0001 0.0001 0.0049
0.9957 0.0005 0.0024 0.0013
0.9530 0.0062 0.0006 0.0402
0.9996 0.0000 0.0000 0.0003
0.9993 0.0007 0.0000 0.0000
0.9995 0.0001 0.0001 0.0002
0.9999 0.0000 0.0000 0.0000
0.9821 0.0022 0.0002 0.0155
0.9980 0.0007 0.0013 0.0001
1.0000 0.0000 0.0000 0.0000
0.9892 0.0010 0.0021 0.0077
0.9999 0.0000 0.0001 0.0000
0.9621 0.0014 0.0339 0.0026
1.0000 0.0000 0.0000 0.0000
0.9971 0.0002 0.0022 0.0005
1.0000 0.0000 0.0000 0.0000
0.9994 0.0000 0.0000 0.0005
0.9994 0.0006 0.0000 0.0000
0.9998 0.0002 0.0000 0.0000
0.9914 0.0051 0.0002 0.0033
0.9929 0.0012 0.0000 0.0059
0.9953 0.0009 0.0000 0.0038
1.0000 0.0000 0.0000 0.0000
0.9997 0.0000 0.0000 0.0003
0.9998 0.0001 0.0000 0.0001
0.9999 0.0000 0.0000 0.0001
1.0000 0.0000 0.0000 0.0000
0.9954 0.0001 0.0001 0.0044
1.0000 0.0000 0.0000 0.0000
0.9994 0.0001 0.0004 0.0001
0.9998 0.0001 0.0000 0.0001
0.9993 0.0003 0.0000 0.0004
1.0000 0.0000 0.0000 0.0000
1.0000 0.0000 0.0000 0.0000
0.9983 0.0000 0.0001 0.0016
0.8673 0.0001 0.1296 0.0030
0.9998 0.0001 0.0000 0.0000
0.9984 0.0003 0.0001 0.0012
0.9999 0.0000 0.0000 0.0001
0.9997 0.0000 0.0000 0.0003
0.9998 0.0000 0.0000 0.0001
1.0000 0.0000 0.0000 0.0000
1.0000 0.0000 0.0000 0.0000
0.9980 0.0001 0.0000 0.0018
0.9995 0.0000 0.0002 0.0002
1.0000 0.0000 0.0000 0.0000
0.9995 0.0000 0.0000 0.0004
1.0000 0.0000 0.0000 0.0000
0.9996 0.0000 0.0000 0.0004
0.9975 0.0014 0.0008 0.0004
0.9907 0.0079 0.0011 0.0003
1.0000 0.0000 0.0000 0.0000
0.9999 0.0000 0.0000 0.0001
0.9995 0.0004 0.0000 0.0000
0.9931 0.0001 0.0008 0.0060
0.9978 0.0000 0.0001 0.0020
0.9952 0.0000 0.0006 0.0042
0.9995 0.0000 0.0003 0.0001
0.9933 0.0000 0.0019 0.0047
1.0000 0.0000 0.0000 0.0000
1.0000 0.0000 0.0000 0.0000
0.9993 0.0000 0.0001 0.0006
0.9999 0.0000 0.0000 0.0000
0.9995 0.0004 0.0000 0.0002
0.9997 0.0001 0.0000 0.0003
0.9998 0.0002 0.0000 0.0000
0.9999 0.0000 0.0000 0.0001
0.9992 0.0002 0.0000 0.0006
0.9822 0.0011 0.0001 0.0166
0.9987 0.0001 0.0000 0.0012
0.9992 0.0001 0.0004 0.0003
1.0000 0.0000 0.0000 0.0000
0.9799 0.0003 0.0001 0.0197
0.8501 0.0889 0.0387 0.0224
0.9957 0.0000 0.0000 0.0043
1.0000 0.0000 0.0000 0.0000
0.9908 0.0063 0.0000 0.0028
0.9598 0.0009 0.0001 0.0392
0.9981 0.0001 0.0000 0.0019
1.0000 0.0000 0.0000 0.0000
0.9947 0.0004 0.0024 0.0025
0.9997 0.0000 0.0001 0.0002
0.9986 0.0008 0.0005 0.0000
0.9997 0.0000 0.0000 0.0003
0.9999 0.0000 0.0000 0.0001
0.9999 0.0000 0.0001 0.0000
0.9998 0.0000 0.0000 0.0002
0.9999 0.0000 0.0000 0.0001
0.9998 0.0000 0.0000 0.0001
0.9942 0.0001 0.0000 0.0056
1.0000 0.0000 0.0000 0.0000
0.9998 0.0001 0.0001 0.0000
0.9971 0.0000 0.0000 0.0028
0.9958 0.0000 0.0000 0.0042
0.9936 0.0021 0.0001 0.0042
0.9909 0.0001 0.0001 0.0090
0.9999 0.0000 0.0000 0.0001
0.9996 0.0000 0.0001 0.0003
1.0000 0.0000 0.0000 0.0000
0.9904 0.0047 0.0000 0.0049
0.9996 0.0000 0.0000 0.0004
1.0000 0.0000 0.0000 0.0000
0.9991 0.0002 0.0007 0.0000
0.9997 0.0001 0.0000 0.0002
0.9995 0.0002 0.0000 0.0002
0.9998 0.0001 0.0000 0.0000
1.0000 0.0000 0.0000 0.0000
1.0000 0.0000 0.0000 0.0000
0.9999 0.0000 0.0001 0.0000
0.9966 0.0001 0.0018 0.0015
0.9998 0.0002 0.0000 0.0000
0.9997 0.0002 0.0000 0.0001
0.9953 0.0003 0.0008 0.0037
0.9961 0.0000 0.0014 0.0026
0.9992 0.0000 0.0006 0.0002
0.9997 0.0001 0.0001 0.0001
1.0000 0.0000 0.0000 0.0000
0.9997 0.0003 0.0000 0.0000
0.9987 0.0001 0.0010 0.0002
0.9994 0.0002 0.0003 0.0002
0.9985 0.0000 0.0003 0.0011
1.0000 0.0000 0.0000 0.0000
0.9998 0.0000 0.0000 0.0001
0.9963 0.0005 0.0028 0.0004
0.9996 0.0000 0.0002 0.0001
0.9989 0.0003 0.0005 0.0003
0.9880 0.0004 0.0041 0.0075
0.9998 0.0002 0.0000 0.0000
0.9953 0.0000 0.0001 0.0046
0.9999 0.0000 0.0000 0.0000
0.9999 0.0001 0.0000 0.0000
1.0000 0.0000 0.0000 0.0000
0.9994 0.0001 0.0003 0.0002
0.9996 0.0000 0.0001 0.0003
0.9179 0.0001 0.0008 0.0812
1.0000 0.0000 0.0000 0.0000
0.9992 0.0001 0.0003 0.0004
0.9972 0.0002 0.0001 0.0025
0.9994 0.0002 0.0000 0.0004
0.9990 0.0006 0.0000 0.0004
0.9994 0.0001 0.0000 0.0005
0.9995 0.0000 0.0001 0.0003
0.9976 0.0000 0.0003 0.0020
0.9986 0.0000 0.0007 0.0006
0.9996 0.0004 0.0000 0.0000
0.9998 0.0001 0.0000 0.0000
0.9985 0.0003 0.0000 0.0012
0.9951 0.0049 0.0000 0.0000
1.0000 0.0000 0.0000 0.0000
0.9870 0.0005 0.0125 0.0001
0.9996 0.0002 0.0002 0.0000
0.9999 0.0000 0.0000 0.0000
1.0000 0.0000 0.0000 0.0000
0.9999 0.0001 0.0000 0.0000
0.9999 0.0001 0.0000 0.0001
0.9998 0.0002 0.0000 0.0000
0.9961 0.0012 0.0025 0.0002
0.9997 0.0000 0.0000 0.0003
0.9720 0.0179 0.0095 0.0006
1.0000 0.0000 0.0000 0.0000
0.9997 0.0002 0.0001 0.0000
0.9998 0.0001 0.0000 0.0000
0.9999 0.0000 0.0001 0.0000
0.9977 0.0002 0.0017 0.0004
0.9202 0.0100 0.0698 0.0000
0.9900 0.0001 0.0100 0.0000
0.9988 0.0000 0.0012 0.0000
0.9988 0.0000 0.0012 0.0000
0.9997 0.0001 0.0001 0.0001
0.9996 0.0001 0.0003 0.0000
0.9089 0.0045 0.0783 0.0083
0.9999 0.0000 0.0001 0.0000
0.9999 0.0001 0.0000 0.0000
1.0000 0.0000 0.0000 0.0000
0.9996 0.0003 0.0001 0.0000
0.9838 0.0009 0.0152 0.0001
0.9826 0.0056 0.0083 0.0035
0.9953 0.0020 0.0011 0.0016
0.9994 0.0005 0.0000 0.0000
0.9971 0.0001 0.0000 0.0028
0.9999 0.0000 0.0000 0.0001
0.9986 0.0009 0.0001 0.0004
0.9764 0.0000 0.0000 0.0236
0.9970 0.0002 0.0005 0.0022
0.9999 0.0000 0.0000 0.0001
0.9993 0.0001 0.0000 0.0006
0.9996 0.0000 0.0000 0.0003
0.9966 0.0015 0.0014 0.0005
1.0000 0.0000 0.0000 0.0000
0.9996 0.0004 0.0000 0.0000
0.9992 0.0003 0.0004 0.0001
1.0000 0.0000 0.0000 0.0000
0.9984 0.0000 0.0000 0.0016
0.9778 0.0197 0.0024 0.0001
0.9991 0.0003 0.0006 0.0000
0.9983 0.0000 0.0002 0.0015
1.0000 0.0000 0.0000 0.0000
0.9999 0.0000 0.0000 0.0000
0.9826 0.0131 0.0020 0.0023
0.9999 0.0001 0.0001 0.0000
1.0000 0.0000 0.0000 0.0000
0.9999 0.0000 0.0001 0.0000
0.9948 0.0000 0.0012 0.0040
0.9997 0.0000 0.0000 0.0003
1.0000 0.0000 0.0000 0.0000
0.9324 0.0188 0.0430 0.0058
0.9999 0.0000 0.0000 0.0000
0.9958 0.0002 0.0006 0.0034
0.9998 0.0000 0.0000 0.0001
0.9977 0.0001 0.0014 0.0008
1.0000 0.0000 0.0000 0.0000
0.9996 0.0002 0.0000 0.0001
1.0000 0.0000 0.0000 0.0000
0.9976 0.0003 0.0001 0.0020
0.9995 0.0000 0.0001 0.0005
0.9819 0.0002 0.0025 0.0154
0.9927 0.0005 0.0035 0.0033
0.7665 0.0103 0.1971 0.0260
1.0000 0.0000 0.0000 0.0000
1.0000 0.0000 0.0000 0.0000
1.0000 0.0000 0.0000 0.0000
1.0000 0.0000 0.0000 0.0000
1.0000 0.0000 0.0000 0.0000
0.9986 0.0005 0.0005 0.0005
0.9995 0.0001 0.0003 0.0000
1.0000 0.0000 0.0000 0.0000
1.0000 0.0000 0.0000 0.0000
0.9990 0.0002 0.0002 0.0006
1.0000 0.0000 0.0000 0.0000
1.0000 0.0000 0.0000 0.0000
0.9925 0.0025 0.0023 0.0026
1.0000 0.0000 0.0000 0.0000
0.6855 0.0218 0.2895 0.0032
0.9999 0.0000 0.0000 0.0000
0.9980 0.0005 0.0001 0.0014
0.9801 0.0003 0.0016 0.0180
1.0000 0.0000 0.0000 0.0000
0.9989 0.0010 0.0001 0.0000
1.0000 0.0000 0.0000 0.0000
0.9981 0.0001 0.0000 0.0019
0.9989 0.0007 0.0001 0.0003
0.9978 0.0001 0.0020 0.0002
0.9852 0.0000 0.0000 0.0148
0.9989 0.0001 0.0001 0.0009
0.9997 0.0000 0.0003 0.0000
0.9979 0.0001 0.0007 0.0013
0.9991 0.0000 0.0000 0.0009
0.9996 0.0000 0.0002 0.0002
0.1012 0.0150 0.1002 0.7836
0.9975 0.0003 0.0000 0.0021
0.9685 0.0060 0.0247 0.0007
0.9993 0.0003 0.0002 0.0001
1.0000 0.0000 0.0000 0.0000
0.9999 0.0000 0.0000 0.0000
0.9977 0.0000 0.0000 0.0023
1.0000 0.0000 0.0000 0.0000
0.9997 0.0000 0.0000 0.0002
0.9999 0.0000 0.0000 0.0000
1.0000 0.0000 0.0000 0.0000
0.9988 0.0004 0.0001 0.0007
0.9973 0.0002 0.0011 0.0015
0.9945 0.0014 0.0002 0.0038
1.0000 0.0000 0.0000 0.0000
0.9987 0.0004 0.0002 0.0008
1.0000 0.0000 0.0000 0.0000
0.9999 0.0000 0.0000 0.0000
0.9998 0.0000 0.0000 0.0002
0.9992 0.0000 0.0000 0.0007
0.9984 0.0001 0.0001 0.0014
0.9998 0.0000 0.0000 0.0002
1.0000 0.0000 0.0000 0.0000
1.0000 0.0000 0.0000 0.0000
1.0000 0.0000 0.0000 0.0000
0.9991 0.0000 0.0001 0.0007
0.9981 0.0007 0.0002 0.0010
0.9941 0.0000 0.0006 0.0052
0.9999 0.0000 0.0000 0.0001
0.9994 0.0005 0.0000 0.0001
1.0000 0.0000 0.0000 0.0000
0.9982 0.0007 0.0001 0.0010
0.9994 0.0000 0.0000 0.0006
1.0000 0.0000 0.0000 0.0000
1.0000 0.0000 0.0000 0.0000
1.0000 0.0000 0.0000 0.0000
1.0000 0.0000 0.0000 0.0000
0.9997 0.0000 0.0000 0.0003
1.0000 0.0000 0.0000 0.0000
1.0000 0.0000 0.0000 0.0000
0.9984 0.0000 0.0000 0.0016
0.9770 0.0011 0.0012 0.0206
1.0000 0.0000 0.0000 0.0000
1.0000 0.0000 0.0000 0.0000
0.9999 0.0000 0.0000 0.0000
0.8916 0.0120 0.0006 0.0958
0.9200 0.0000 0.0000 0.0799
0.0674 0.0420 0.0245 0.8661
0.9990 0.0004 0.0000 0.0006
0.9999 0.0000 0.0000 0.0001
0.9994 0.0003 0.0000 0.0003
0.9998 0.0002 0.0000 0.0000
0.9998 0.0000 0.0000 0.0002
0.9998 0.0001 0.0000 0.0002
1.0000 0.0000 0.0000 0.0000
0.9977 0.0000 0.0000 0.0023
0.9997 0.0000 0.0000 0.0003
1.0000 0.0000 0.0000 0.0000
1.0000 0.0000 0.0000 0.0000
1.0000 0.0000 0.0000 0.0000
1.0000 0.0000 0.0000 0.0000
1.0000 0.0000 0.0000 0.0000
0.9998 0.0000 0.0000 0.0002
0.9989 0.0010 0.0000 0.0001
0.9978 0.0000 0.0000 0.0022
0.9999 0.0000 0.0000 0.0001
0.9999 0.0001 0.0000 0.0000
0.9999 0.0000 0.0000 0.0001
0.9999 0.0000 0.0000 0.0001
0.9934 0.0005 0.0002 0.0060
1.0000 0.0000 0.0000 0.0000
1.0000 0.0000 0.0000 0.0000
0.9990 0.0002 0.0000 0.0008
1.0000 0.0000 0.0000 0.0000
1.0000 0.0000 0.0000 0.0000
0.9994 0.0000 0.0000 0.0006
0.9946 0.0003 0.0000 0.0050
0.9972 0.0001 0.0002 0.0025
1.0000 0.0000 0.0000 0.0000
1.0000 0.0000 0.0000 0.0000
0.9998 0.0000 0.0000 0.0001
0.9997 0.0001 0.0001 0.0001
0.9999 0.0000 0.0000 0.0000
0.9999 0.0000 0.0000 0.0001
0.9987 0.0000 0.0011 0.0001
0.9978 0.0001 0.0000 0.0021
0.9995 0.0003 0.0000 0.0003
0.9838 0.0000 0.0001 0.0161
0.9998 0.0000 0.0000 0.0002
0.9999 0.0000 0.0000 0.0001
1.0000 0.0000 0.0000 0.0000
1.0000 0.0000 0.0000 0.0000
0.9990 0.0000 0.0002 0.0008
0.9975 0.0000 0.0001 0.0024
0.9998 0.0000 0.0000 0.0002
0.9988 0.0002 0.0006 0.0004
0.0061 0.9383 0.0008 0.0548
0.0005 0.9986 0.0004 0.0005
0.0000 0.9999 0.0000 0.0001
0.0001 0.9999 0.0000 0.0000
0.0000 0.9997 0.0003 0.0000
0.0003 0.9995 0.0000 0.0003
0.0001 0.9968 0.0000 0.0031
0.0000 1.0000 0.0000 0.0000
0.0000 0.0992 0.0523 0.8485
0.0002 0.9996 0.0002 0.0000
0.0000 0.9999 0.0000 0.0001
0.0000 0.9954 0.0046 0.0000
0.0001 0.9999 0.0001 0.0000
0.0000 0.0240 0.9759 0.0001
0.0001 0.8442 0.1553 0.0004
0.0003 0.2459 0.7533 0.0006
0.0000 0.7849 0.1674 0.0477
0.0000 0.9994 0.0001 0.0006
0.0000 0.9997 0.0000 0.0003
0.0018 0.9551 0.0404 0.0028
0.0000 0.9995 0.0005 0.0001
0.0000 0.9991 0.0002 0.0007
0.0001 0.9958 0.0004 0.0037
0.0000 0.9999 0.0000 0.0001
0.0000 0.9999 0.0000 0.0001
0.0000 0.0453 0.9544 0.0003
0.0000 0.7166 0.0137 0.2697
0.0000 0.9900 0.0045 0.0055
0.0000 1.0000 0.0000 0.0000
0.0000 0.9986 0.0000 0.0014
0.0001 0.9989 0.0001 0.0010
0.0001 0.7031 0.2963 0.0005
0.0000 1.0000 0.0000 0.0000
0.0000 1.0000 0.0000 0.0000
0.0000 0.9999 0.0001 0.0000
0.0000 0.9999 0.0001 0.0001
0.0000 0.0145 0.7505 0.2350
0.0001 0.9998 0.0000 0.0001
0.0000 1.0000 0.0000 0.0000
0.0000 0.9999 0.0000 0.0001
0.0000 0.9987 0.0013 0.0000
0.0000 0.9997 0.0003 0.0000
0.0001 0.9987 0.0003 0.0010
0.0000 0.9914 0.0032 0.0054
0.0024 0.9970 0.0002 0.0004
0.0000 0.9999 0.0000 0.0001
0.0001 0.9998 0.0002 0.0000
0.0002 0.9991 0.0003 0.0005
0.0000 0.9999 0.0001 0.0000
0.0030 0.6097 0.3841 0.0032
0.0000 1.0000 0.0000 0.0000
0.0000 1.0000 0.0000 0.0000
0.0000 0.9998 0.0001 0.0001
0.0000 0.9885 0.0114 0.0001
0.0000 0.9999 0.0000 0.0000
0.0000 1.0000 0.0000 0.0000
0.0000 1.0000 0.0000 0.0000
0.0000 1.0000 0.0000 0.0000
0.0000 1.0000 0.0000 0.0000
0.0000 0.9998 0.0002 0.0000
0.0000 1.0000 0.0000 0.0000
0.0438 0.1120 0.8383 0.0058
0.0000 0.9994 0.0006 0.0000
0.0000 0.9998 0.0002 0.0000
0.0000 0.9997 0.0003 0.0000
0.0000 1.0000 0.0000 0.0000
0.0002 0.7007 0.2919 0.0072
0.0000 0.3023 0.6288 0.0689
0.0002 0.0290 0.9478 0.0230
0.0000 1.0000 0.0000 0.0000
0.0000 0.9999 0.0001 0.0000
0.0000 0.9987 0.0000 0.0013
0.0000 0.9988 0.0005 0.0007
0.0128 0.9499 0.0094 0.0278
0.0000 0.9166 0.0810 0.0023
0.0003 0.0127 0.8926 0.0944
0.0000 0.9989 0.0000 0.0011
0.0000 0.9839 0.0006 0.0154
0.0000 0.9969 0.0005 0.0027
0.0001 0.9932 0.0012 0.0055
0.0001 0.9993 0.0004 0.0001
0.0015 0.9556 0.0044 0.0385
0.0000 0.8671 0.0079 0.1249
0.0000 0.9867 0.0002 0.0131
0.0000 0.9553 0.0008 0.0438
0.0010 0.9989 0.0001 0.0000
0.0000 0.9993 0.0006 0.0001
0.0000 0.9996 0.0000 0.0004
0.0000 0.9999 0.0000 0.0000
0.0000 1.0000 0.0000 0.0000
0.0000 0.9998 0.0000 0.0002
0.0000 0.9999 0.0000 0.0000
0.0000 1.0000 0.0000 0.0000
0.0000 0.9999 0.0000 0.0000
0.0001 0.9998 0.0001 0.0000
0.0000 0.9978 0.0022 0.0000
0.0002 0.9995 0.0002 0.0001
0.0000 0.9620 0.0376 0.0004
0.0000 1.0000 0.0000 0.0000
0.0001 0.9999 0.0000 0.0000
0.0000 1.0000 0.0000 0.0000
0.0001 0.9993 0.0004 0.0002
0.0000 0.9999 0.0000 0.0000
0.0000 1.0000 0.0000 0.0000
0.0000 0.9999 0.0000 0.0000
0.0000 1.0000 0.0000 0.0000
0.0000 0.9999 0.0000 0.0000
0.0000 1.0000 0.0000 0.0000
0.0000 0.7552 0.2438 0.0010
0.0001 0.9998 0.0001 0.0000
0.0000 1.0000 0.0000 0.0000
0.0000 1.0000 0.0000 0.0000
0.0000 1.0000 0.0000 0.0000
0.0016 0.8765 0.0493 0.0726
0.0000 0.9957 0.0006 0.0037
0.0005 0.9671 0.0243 0.0081
0.0005 0.9727 0.0173 0.0095
0.0009 0.2933 0.0096 0.6961
0.0005 0.4435 0.0742 0.4818
0.0000 0.9994 0.0000 0.0005
0.0000 0.9643 0.0001 0.0356
0.0001 0.9993 0.0000 0.0006
0.0002 0.8772 0.0026 0.1201
0.0116 0.9315 0.0443 0.0126
0.0003 0.9793 0.0009 0.0195
0.0007 0.9725 0.0043 0.0225
0.0006 0.9986 0.0002 0.0006
0.0000 0.9994 0.0001 0.0005
0.0000 0.9997 0.0000 0.0003
0.0000 0.9898 0.0026 0.0076
0.0000 1.0000 0.0000 0.0000
0.0001 0.9992 0.0001 0.0007
0.0000 0.8141 0.1822 0.0037
0.0000 0.1796 0.0092 0.8113
0.0121 0.9827 0.0006 0.0047
0.0000 0.4337 0.5506 0.0157
0.0000 0.9978 0.0007 0.0016
0.0000 1.0000 0.0000 0.0000
0.0000 1.0000 0.0000 0.0000
0.0003 0.9991 0.0003 0.0003
0.0000 0.7858 0.2142 0.0000
0.0000 0.5924 0.4074 0.0001
0.0001 0.8389 0.1573 0.0037
0.0004 0.9993 0.0002 0.0001
0.0000 0.9904 0.0094 0.0002
0.0000 0.4687 0.5313 0.0001
0.0001 0.1672 0.4518 0.3808
0.0000 0.0275 0.9626 0.0099
0.0000 0.3461 0.6536 0.0003
0.0000 1.0000 0.0000 0.0000
0.0000 0.9999 0.0000 0.0000
0.0000 0.9965 0.0034 0.0001
0.0001 0.9988 0.0001 0.0010
0.0000 1.0000 0.0000 0.0000
0.0000 0.9999 0.0000 0.0001
0.0000 0.9891 0.0108 0.0000
0.0004 0.1500 0.8491 0.0006
0.0000 0.9995 0.0000 0.0005
0.0007 0.9991 0.0001 0.0000
0.0000 1.0000 0.0000 0.0000
0.0067 0.8103 0.1214 0.0616
0.0000 1.0000 0.0000 0.0000
0.0000 0.9999 0.0001 0.0001
0.0003 0.9995 0.0000 0.0002
0.0000 0.9993 0.0000 0.0007
0.0000 0.9997 0.0000 0.0002
0.0000 0.9999 0.0000 0.0001
0.0000 0.9998 0.0002 0.0000
0.0014 0.9983 0.0002 0.0001
0.0000 0.9998 0.0002 0.0000
0.0025 0.9972 0.0003 0.0000
0.0002 0.9997 0.0001 0.0000
0.0006 0.9787 0.0039 0.0168
0.0000 0.9975 0.0008 0.0017
0.0000 1.0000 0.0000 0.0000
0.0244 0.9606 0.0116 0.0035
0.0000 0.9999 0.0000 0.0000
0.0002 0.9992 0.0005 0.0001
0.0287 0.9620 0.0042 0.0052
0.0001 0.9994 0.0000 0.0005
0.0000 0.9998 0.0002 0.0000
0.0000 1.0000 0.0000 0.0000
0.0000 0.0969 0.1593 0.7438
0.0001 0.9998 0.0000 0.0001
0.0036 0.9934 0.0003 0.0027
0.0316 0.9144 0.0186 0.0354
0.0000 0.9511 0.0485 0.0004
0.0000 1.0000 0.0000 0.0000
0.0000 0.9999 0.0000 0.0001
0.0000 1.0000 0.0000 0.0000
0.0000 0.9999 0.0000 0.0000
0.0001 0.9915 0.0000 0.0084
0.0000 0.9985 0.0000 0.0015
0.0000 1.0000 0.0000 0.0000
0.0000 0.9993 0.0001 0.0005
0.0000 0.0662 0.9338 0.0000
0.0000 0.9623 0.0044 0.0332
0.0000 0.9994 0.0001 0.0006
0.0000 1.0000 0.0000 0.0000
0.0019 0.3288 0.6443 0.0250
0.0001 0.9758 0.0016 0.0225
0.0001 0.9900 0.0064 0.0035
0.0000 0.9968 0.0002 0.0030
0.0000 0.9942 0.0058 0.0000
0.0000 0.9997 0.0000 0.0003
0.0000 1.0000 0.0000 0.0000
0.0000 1.0000 0.0000 0.0000
0.0000 0.9997 0.0001 0.0002
0.0000 1.0000 0.0000 0.0000
0.0000 1.0000 0.0000 0.0000
0.0000 0.9955 0.0042 0.0003
0.0000 0.9986 0.0014 0.0000
0.0000 1.0000 0.0000 0.0000
0.0000 1.0000 0.0000 0.0000
0.0000 0.9999 0.0001 0.0000
0.0000 0.9999 0.0001 0.0000
0.0000 0.9954 0.0046 0.0000
0.0000 1.0000 0.0000 0.0000
0.0000 1.0000 0.0000 0.0000
0.0000 1.0000 0.0000 0.0000
0.0000 1.0000 0.0000 0.0000
0.0000 0.9999 0.0001 0.0000
0.0000 1.0000 0.0000 0.0000
0.0000 1.0000 0.0000 0.0000
0.0000 1.0000 0.0000 0.0000
0.0006 0.9969 0.0020 0.0005
0.0000 1.0000 0.0000 0.0000
0.0000 0.9999 0.0000 0.0001
0.0003 0.5289 0.4533 0.0175
0.0000 1.0000 0.0000 0.0000
0.0000 0.9998 0.0000 0.0002
0.0000 0.9993 0.0006 0.0001
0.0016 0.0572 0.8457 0.0955
0.0002 0.0725 0.8814 0.0459
0.0000 0.9992 0.0000 0.0007
0.0000 0.9981 0.0017 0.0001
0.0000 0.0021 0.2701 0.7278
0.2302 0.2254 0.4526 0.0919
0.0000 0.9752 0.0019 0.0228
0.0000 0.1435 0.0001 0.8563
0.0000 0.8744 0.0075 0.1181
0.0002 0.9628 0.0242 0.0128
0.0001 0.9267 0.0010 0.0721
0.0000 0.9982 0.0017 0.0001
0.0001 0.3339 0.0495 0.6165
0.0000 0.9988 0.0012 0.0000
0.0000 0.9998 0.0001 0.0000
0.0000 0.9997 0.0001 0.0001
0.0000 0.8375 0.1622 0.0003
0.0000 0.9998 0.0001 0.0001
0.0000 1.0000 0.0000 0.0000
0.0000 0.9999 0.0001 0.0000
0.0000 0.9082 0.0366 0.0552
0.0000 0.9946 0.0054 0.0000
0.0000 1.0000 0.0000 0.0000
0.0000 0.9999 0.0000 0.0000
0.0000 1.0000 0.0000 0.0000
0.0002 0.9996 0.0001 0.0001
0.0000 1.0000 0.0000 0.0000
0.0001 0.9999 0.0000 0.0000
0.0000 1.0000 0.0000 0.0000
0.0000 1.0000 0.0000 0.0000
0.0000 1.0000 0.0000 0.0000
0.0004 0.2940 0.7053 0.0002
0.0000 0.9999 0.0000 0.0001
0.0000 1.0000 0.0000 0.0000
0.0000 0.9999 0.0000 0.0001
0.0000 1.0000 0.0000 0.0000
0.0014 0.6057 0.2126 0.1803
0.0000 0.9948 0.0006 0.0046
0.0001 0.9990 0.0000 0.0009
0.0007 0.9961 0.0030 0.0002
0.0000 0.9996 0.0000 0.0004
0.0000 0.9996 0.0003 0.0001
0.0000 0.9863 0.0007 0.0130
0.0000 1.0000 0.0000 0.0000
0.0000 0.9993 0.0007 0.0000
0.0000 0.9950 0.0038 0.0012
0.0000 0.9916 0.0013 0.0072
0.0000 0.9994 0.0000 0.0005
0.0000 0.9997 0.0002 0.0000
0.0000 1.0000 0.0000 0.0000
0.0001 0.9885 0.0071 0.0043
0.0000 1.0000 0.0000 0.0000
0.0000 0.9999 0.0000 0.0001
0.0000 0.9979 0.0006 0.0016
0.0000 0.9979 0.0020 0.0001
0.0141 0.9536 0.0144 0.0180
0.0002 0.7625 0.2373 0.0000
0.0000 1.0000 0.0000 0.0000
0.0000 1.0000 0.0000 0.0000
0.0000 0.9944 0.0055 0.0001
0.0000 0.9998 0.0002 0.0000
0.0000 0.9998 0.0002 0.0000
0.0000 1.0000 0.0000 0.0000
0.0000 1.0000 0.0000 0.0000
0.0000 0.9999 0.0001 0.0000
0.0001 0.9999 0.0000 0.0000
0.0000 1.0000 0.0000 0.0000
0.0000 0.9996 0.0003 0.0000
0.0000 1.0000 0.0000 0.0000
0.0001 0.9990 0.0001 0.0008
0.0011 0.9986 0.0001 0.0002
0.0000 0.9997 0.0003 0.0000
0.0000 0.9999 0.0001 0.0000
0.0000 1.0000 0.0000 0.0000
0.0000 0.9975 0.0001 0.0025
0.0000 0.9885 0.0104 0.0012
0.0000 1.0000 0.0000 0.0000
0.0000 0.9999 0.0001 0.0000
0.0000 0.9852 0.0148 0.0000
0.0000 0.9995 0.0003 0.0001
0.0000 0.9598 0.0010 0.0392
0.0000 0.9978 0.0001 0.0022
0.0000 0.9999 0.0001 0.0000
0.0000 1.0000 0.0000 0.0000
0.0000 0.9747 0.0253 0.0000
0.0000 0.9498 0.0501 0.0000
0.0000 0.9980 0.0004 0.0016
0.0000 0.9999 0.0000 0.0001
0.0001 0.9931 0.0013 0.0055
0.0000 0.9999 0.0000 0.0001
0.0000 0.9988 0.0012 0.0000
0.0387 0.9102 0.0257 0.0254
0.0058 0.9499 0.0298 0.0146
0.0001 0.2065 0.7930 0.0005
0.0000 0.8650 0.1344 0.0006
0.0001 0.7372 0.2626 0.0000
0.0002 0.3973 0.6023 0.0002
0.0001 0.9988 0.0011 0.0000
0.0001 0.9816 0.0183 0.0001
0.0321 0.5516 0.4046 0.0117
0.0000 0.9988 0.0012 0.0000
0.0000 0.9974 0.0026 0.0000
0.3774 0.5784 0.0412 0.0030
0.0001 0.9995 0.0002 0.0002
0.0218 0.6235 0.3540 0.0007
0.0012 0.9980 0.0003 0.0005
0.0008 0.9937 0.0053 0.0002
0.0001 0.9986 0.0013 0.0001
0.0001 0.9998 0.0001 0.0000
0.0031 0.9954 0.0013 0.0002
0.0000 0.9906 0.0094 0.0000
0.0000 0.9999 0.0000 0.0000
0.0000 1.0000 0.0000 0.0000
0.0000 0.9999 0.0001 0.0000
0.0000 1.0000 0.0000 0.0000
0.0000 0.9999 0.0000 0.0000
0.0002 0.9990 0.0003 0.0005
0.0000 1.0000 0.0000 0.0000
0.0001 0.9909 0.0090 0.0000
0.0000 0.9984 0.0016 0.0000
0.0000 1.0000 0.0000 0.0000
0.0002 0.9991 0.0001 0.0006
0.0000 0.9999 0.0000 0.0000
0.0001 0.6422 0.3572 0.0005
0.0013 0.9950 0.0005 0.0032
0.0080 0.9916 0.0002 0.0002
0.0001 0.9997 0.0000 0.0002
0.0002 0.9881 0.0083 0.0034
0.0001 0.9995 0.0004 0.0000
0.0008 0.7417 0.2468 0.0106
0.0001 0.9994 0.0004 0.0001
0.0003 0.9825 0.0013 0.0159
0.0000 1.0000 0.0000 0.0000
0.0005 0.9993 0.0000 0.0002
0.0000 0.9999 0.0001 0.0000
0.0010 0.9834 0.0134 0.0023
0.0000 1.0000 0.0000 0.0000
0.0000 0.9995 0.0002 0.0003
0.0000 1.0000 0.0000 0.0000
0.0000 0.9583 0.0396 0.0022
0.0044 0.9905 0.0027 0.0023
0.0003 0.9986 0.0009 0.0002
0.0000 0.9986 0.0013 0.0001
0.0000 0.9986 0.0000 0.0014
0.0009 0.9912 0.0040 0.0038
0.0000 0.9997 0.0001 0.0002
0.0000 0.9977 0.0023 0.0000
0.0000 0.9988 0.0012 0.0000
0.0000 0.9993 0.0007 0.0000
0.0000 0.9628 0.0372 0.0000
0.0000 0.4178 0.5822 0.0000
0.0000 0.8712 0.1287 0.0002
0.0000 0.9687 0.0313 0.0000
0.0001 0.9999 0.0000 0.0000
0.0000 0.9999 0.0001 0.0000
0.0006 0.9991 0.0003 0.0000
0.0000 1.0000 0.0000 0.0000
0.0000 0.9997 0.0003 0.0000
0.0000 0.9999 0.0001 0.0000
0.0000 0.9995 0.0005 0.0000
0.0000 0.8674 0.1326 0.0000
0.0031 0.9507 0.0459 0.0003
0.0000 0.9997 0.0003 0.0000
0.0000 0.9336 0.0664 0.0000
0.0000 0.9975 0.0015 0.0010
0.0001 0.9994 0.0005 0.0000
0.0004 0.6520 0.3411 0.0065
0.0000 0.9998 0.0002 0.0000
0.0000 0.4493 0.5507 0.0000
0.0082 0.9840 0.0040 0.0038
0.0000 0.9737 0.0100 0.0162
0.0000 0.9964 0.0035 0.0000
0.0001 0.0851 0.9110 0.0038
0.0001 0.9998 0.0001 0.0000
0.0001 0.8708 0.1002 0.0290
0.0000 0.7136 0.0461 0.2403
0.0000 0.9967 0.0004 0.0029
0.0000 0.9996 0.0003 0.0001
0.0065 0.4766 0.4433 0.0737
0.0000 0.9997 0.0001 0.0002
0.0001 0.9982 0.0012 0.0005
0.0000 0.9997 0.0002 0.0001
0.0000 0.9978 0.0006 0.0016
0.0000 0.9981 0.0004 0.0015
0.0000 0.9999 0.0000 0.0000
0.0001 0.9576 0.0387 0.0036
0.0000 0.9969 0.0031 0.0000
0.0000 0.9961 0.0034 0.0005
0.0000 0.7334 0.2621 0.0045
0.0003 0.9753 0.0244 0.0000
0.0000 0.9943 0.0051 0.0006
0.0010 0.9762 0.0226 0.0002
0.0010 0.7026 0.2926 0.0038
0.0000 0.9745 0.0234 0.0020
0.0001 0.9891 0.0108 0.0000
0.0000 0.2933 0.7025 0.0042
0.0000 0.9969 0.0027 0.0004
0.0000 0.9107 0.0045 0.0847
0.0010 0.0703 0.4703 0.4584
0.0017 0.6618 0.2081 0.1284
0.0000 0.2075 0.7855 0.0071
0.0000 0.9968 0.0032 0.0000
0.0000 0.9495 0.0104 0.0401
0.0005 0.4589 0.5406 0.0000
0.0010 0.5637 0.2837 0.1516
0.0001 0.7867 0.1402 0.0730
0.0000 0.9958 0.0008 0.0034
0.0003 0.9632 0.0352 0.0012
0.0000 0.9775 0.0224 0.0001
0.0000 0.9857 0.0127 0.0016
0.0000 0.9998 0.0001 0.0000
0.0001 0.0240 0.3232 0.6527
0.0000 0.9999 0.0001 0.0000
0.0004 0.8935 0.0939 0.0123
0.0000 0.8257 0.1672 0.0071
0.0002 0.9486 0.0256 0.0256
0.0000 0.9965 0.0034 0.0000
0.0431 0.4800 0.4396 0.0373
0.0000 0.9619 0.0375 0.0006
0.0014 0.9936 0.0009 0.0042
0.0053 0.1673 0.8173 0.0102
0.0000 0.2223 0.7773 0.0003
0.0000 0.9247 0.0296 0.0457
0.0047 0.8172 0.1084 0.0698
0.0001 0.9787 0.0037 0.0175
0.0000 0.9846 0.0035 0.0119
0.0002 0.0595 0.9374 0.0028
0.1065 0.3021 0.5515 0.0399
0.0021 0.1214 0.8759 0.0006
0.0000 0.9934 0.0066 0.0000
0.0000 0.2790 0.5095 0.2115
0.0004 0.9701 0.0193 0.0102
0.0000 0.9202 0.0797 0.0000
0.0002 0.7519 0.2464 0.0015
0.0000 0.0937 0.9060 0.0003
0.0003 0.7542 0.2455 0.0000
0.0012 0.0117 0.8020 0.1851
0.0002 0.9119 0.0662 0.0216
0.0000 0.9986 0.0013 0.0001
0.0019 0.7962 0.1954 0.0064
0.0000 0.9943 0.0057 0.0000
0.0000 0.9995 0.0005 0.0000
0.0000 0.9932 0.0068 0.0000
0.0015 0.9026 0.0848 0.0111
0.0001 0.0762 0.9222 0.0016
0.0000 0.9937 0.0035 0.0028
0.0000 0.9870 0.0130 0.0000
0.0000 0.0437 0.9559 0.0004
0.0000 0.9971 0.0028 0.0000
0.0024 0.9717 0.0259 0.0000
0.0000 0.9996 0.0004 0.0000
0.0000 0.9447 0.0553 0.0000
0.0000 0.0617 0.9371 0.0011
0.0001 0.7839 0.2154 0.0006
0.0000 0.1638 0.7957 0.0404
0.0000 0.1403 0.8103 0.0493
0.0001 0.8030 0.1914 0.0055
0.0723 0.6304 0.2891 0.0082
0.0036 0.8710 0.1253 0.0001
0.0001 0.4932 0.4955 0.0113
0.0000 0.9923 0.0070 0.0006
0.0017 0.4046 0.5704 0.0233
0.0006 0.9856 0.0137 0.0001
0.0000 0.9998 0.0002 0.0000
0.0002 0.0725 0.8077 0.1197
0.0007 0.0251 0.9623 0.0118
0.0000 0.1554 0.8438 0.0008
0.0000 0.1409 0.8580 0.0011
0.0001 0.1721 0.8241 0.0037
0.0000 0.5969 0.4030 0.0001
0.0000 0.8951 0.1017 0.0032
0.0004 0.2160 0.7822 0.0014
0.0005 0.1295 0.8661 0.0039
0.0001 0.9594 0.0391 0.0013
0.0000 0.9993 0.0004 0.0003
0.0000 0.7720 0.2277 0.0002
0.0015 0.7870 0.0941 0.1175
0.0000 0.7645 0.2347 0.0008
0.0000 0.9046 0.0806 0.0148
0.0000 0.0170 0.9830 0.0000
0.0000 0.9830 0.0052 0.0117
0.0000 0.1930 0.0455 0.7615
0.0299 0.0781 0.5988 0.2932
0.0083 0.7446 0.2452 0.0019
0.0000 0.7140 0.2852 0.0008
0.0000 0.9988 0.0002 0.0010
0.0001 0.9967 0.0026 0.0005
0.0000 1.0000 0.0000 0.0000
0.0001 0.9753 0.0024 0.0222
0.0000 0.9836 0.0146 0.0018
0.1962 0.5603 0.2018 0.0416
0.0300 0.9636 0.0035 0.0029
0.0010 0.9958 0.0005 0.0028
0.0000 0.6813 0.3130 0.0057
0.0000 0.9487 0.0460 0.0053
0.0000 0.9928 0.0052 0.0020
0.0779 0.6870 0.0286 0.2065
0.0000 0.9995 0.0005 0.0000
0.0037 0.7656 0.1087 0.1220
0.0000 0.9896 0.0070 0.0033
0.0001 0.9686 0.0312 0.0001
0.0992 0.2316 0.6179 0.0513
0.0133 0.4715 0.2941 0.2211
0.0000 0.9785 0.0214 0.0001
0.0000 0.9991 0.0009 0.0000
0.0000 0.7560 0.2438 0.0001
0.0000 0.2911 0.7080 0.0009
0.0000 0.9320 0.0679 0.0000
0.0194 0.4592 0.5210 0.0004
0.0000 0.8663 0.1313 0.0024
0.0000 0.9677 0.0235 0.0088
0.0002 0.9885 0.0039 0.0074
0.0000 1.0000 0.0000 0.0000
0.0000 0.9956 0.0038 0.0006
0.0000 0.9998 0.0002 0.0000
0.0000 0.9992 0.0008 0.0000
0.0044 0.4612 0.5340 0.0004
0.0000 0.9916 0.0082 0.0002
0.0000 0.9871 0.0129 0.0000
0.0354 0.0675 0.8958 0.0013
0.0000 0.9967 0.0032 0.0001
0.0001 0.7221 0.2775 0.0003
0.0013 0.3755 0.5423 0.0810
0.0000 0.9815 0.0166 0.0018
0.0000 0.9990 0.0010 0.0000
0.0003 0.6892 0.3103 0.0002
0.0001 0.9616 0.0383 0.0000
0.0000 0.9976 0.0021 0.0002
0.0000 0.9998 0.0002 0.0000
0.0000 0.9999 0.0001 0.0000
0.0001 0.1610 0.7776 0.0613
0.0000 0.9927 0.0036 0.0037
0.0000 0.9975 0.0023 0.0002
0.0000 0.9894 0.0106 0.0000
0.0001 0.4176 0.1375 0.4447
0.0000 0.9977 0.0023 0.0000
0.0000 0.9933 0.0062 0.0005
0.0000 0.9762 0.0236 0.0002
0.0000 0.6316 0.2261 0.1423
0.0000 0.2833 0.7164 0.0003
0.0000 0.9892 0.0024 0.0085
0.0000 0.9923 0.0062 0.0015
0.0000 0.9840 0.0159 0.0001
0.0000 0.9488 0.0420 0.0092
0.0000 0.8747 0.0001 0.1252
0.0160 0.1020 0.0021 0.8798
0.0105 0.1999 0.2060 0.5836
0.0031 0.8185 0.0291 0.1493
0.0000 0.2820 0.7018 0.0161
0.0000 0.9851 0.0102 0.0047
0.0005 0.9460 0.0062 0.0473
0.0042 0.9810 0.0094 0.0055
0.0000 0.9998 0.0002 0.0000
0.0000 1.0000 0.0000 0.0000
0.0000 0.9389 0.0060 0.0551
0.0004 0.8724 0.1025 0.0247
0.0000 0.9563 0.0433 0.0004
0.0000 0.9936 0.0063 0.0000
0.0000 0.9882 0.0101 0.0017
0.0000 0.4576 0.5422 0.0001
0.0000 0.9973 0.0027 0.0000
0.0000 0.9972 0.0028 0.0000
0.0005 0.4373 0.5488 0.0135
0.0000 0.9985 0.0015 0.0001
0.0000 0.9763 0.0237 0.0000
0.0000 0.9933 0.0067 0.0000
0.0000 0.9997 0.0003 0.0000
0.0000 0.7808 0.2192 0.0000
0.0001 0.6501 0.3496 0.0002
0.0000 0.4236 0.5717 0.0047
0.0000 0.9027 0.0973 0.0000
0.0000 0.9775 0.0225 0.0000
0.0003 0.3747 0.6234 0.0015
0.0000 0.3107 0.6866 0.0027
0.0025 0.7446 0.2484 0.0044
0.0000 0.9975 0.0025 0.0000
0.0001 0.2301 0.7696 0.0002
0.0001 0.2597 0.7390 0.0012
0.0000 0.9960 0.0040 0.0000
0.0001 0.6852 0.3146 0.0000
0.0000 0.0034 0.9965 0.0001
0.0000 0.6799 0.3199 0.0001
0.0000 0.9164 0.0812 0.0024
0.0005 0.7807 0.2187 0.0000
0.0000 0.9882 0.0118 0.0000
0.0019 0.7807 0.2157 0.0017
0.0000 0.9994 0.0006 0.0000
0.0000 0.3975 0.6025 0.0000
0.0000 0.6179 0.3759 0.0063
0.0001 0.2864 0.7135 0.0001
0.0000 0.8981 0.1017 0.0001
0.1289 0.0826 0.7881 0.0004
0.0004 0.1410 0.8585 0.0000
0.0000 0.9773 0.0227 0.0000
0.0000 0.9924 0.0075 0.0000
0.0000 0.9734 0.0266 0.0000
0.0000 0.9990 0.0010 0.0000
0.0000 0.9481 0.0519 0.0000
0.0530 0.6489 0.2975 0.0007
0.0000 0.8683 0.1279 0.0038
0.0135 0.3462 0.6331 0.0072
0.0002 0.7557 0.2438 0.0003
0.0001 0.8413 0.1583 0.0004
0.0000 0.9999 0.0001 0.0000
0.0000 0.9856 0.0144 0.0000
0.0000 0.9954 0.0026 0.0019
0.0000 0.9690 0.0309 0.0001
0.0000 0.4270 0.5730 0.0000
0.0000 0.9167 0.0833 0.0000
0.0000 0.7869 0.2131 0.0000
0.0000 0.9311 0.0688 0.0001
0.0000 0.7319 0.2681 0.0000
0.0006 0.8191 0.1784 0.0018
0.0000 0.9980 0.0020 0.0000
0.0000 0.8352 0.1647 0.0001
0.0000 0.9270 0.0729 0.0000
0.0001 0.0627 0.9368 0.0004
0.0000 0.8663 0.1336 0.0001
0.0000 0.7643 0.2357 0.0000
0.0001 0.8858 0.1134 0.0007
0.0000 0.0021 0.9979 0.0000
0.0000 0.1556 0.8444 0.0000
0.0004 0.4043 0.5950 0.0003
0.0000 0.7824 0.2176 0.0000
0.0001 0.0360 0.0753 0.8886
0.0000 0.9988 0.0009 0.0003
0.0044 0.6257 0.2643 0.1055
0.0060 0.9845 0.0095 0.0000
0.0000 0.9889 0.0110 0.0001
0.0000 0.9461 0.0518 0.0020
0.0000 0.9422 0.0532 0.0046
0.0001 0.6084 0.2969 0.0945
0.0009 0.0119 0.9866 0.0006
0.0000 0.6961 0.3038 0.0001
0.0000 0.9990 0.0010 0.0000
0.0001 0.9655 0.0168 0.0176
0.0000 1.0000 0.0000 0.0000
0.0000 0.2142 0.7855 0.0004
0.0000 0.9919 0.0079 0.0002
0.0000 0.9994 0.0005 0.0001
0.0002 0.9359 0.0472 0.0167
0.0016 0.9907 0.0075 0.0002
0.0008 0.9316 0.0096 0.0579
0.0006 0.8826 0.1166 0.0002
0.0005 0.5607 0.4244 0.0144
0.0001 0.8124 0.0941 0.0934
0.0008 0.3357 0.6629 0.0006
0.0145 0.0811 0.9010 0.0034
0.0000 0.9963 0.0033 0.0004
0.0075 0.3961 0.5964 0.0000
0.0216 0.5076 0.4707 0.0000
0.2989 0.5023 0.1979 0.0008
0.0179 0.5787 0.4008 0.0025
0.0042 0.8445 0.1451 0.0061
0.0000 0.9835 0.0027 0.0137
0.0003 0.7151 0.2786 0.0060
0.0002 0.0627 0.9342 0.0028
0.0000 0.9994 0.0000 0.0006
0.0000 0.9782 0.0156 0.0062
0.0000 0.9932 0.0065 0.0003
0.0000 0.9873 0.0112 0.0014
0.0040 0.0295 0.9617 0.0049
0.0006 0.9526 0.0454 0.0014
0.0016 0.5887 0.4067 0.0030
0.0000 0.9891 0.0109 0.0000
0.0039 0.8675 0.1283 0.0003
0.0028 0.2590 0.7370 0.0011
0.0033 0.0574 0.9099 0.0293
0.0000 0.9960 0.0027 0.0013
0.0002 0.9961 0.0035 0.0001
0.0000 0.9997 0.0003 0.0000
0.0001 0.9851 0.0091 0.0057
0.0202 0.0837 0.6982 0.1979
0.0003 0.6571 0.3426 0.0001
0.0000 0.9918 0.0031 0.0050
0.0000 0.9999 0.0001 0.0000
0.0013 0.2593 0.7376 0.0018
0.0000 0.9096 0.0896 0.0008
0.0000 0.5964 0.4025 0.0011
0.0000 0.9999 0.0001 0.0000
0.0000 0.9965 0.0000 0.0034
0.0000 0.9985 0.0005 0.0010
0.0000 0.9999 0.0000 0.0000
0.0001 0.4484 0.5509 0.0006
0.0000 1.0000 0.0000 0.0000
0.0001 0.9270 0.0067 0.0663
0.0000 1.0000 0.0000 0.0000
0.0000 0.9998 0.0001 0.0001
0.0000 1.0000 0.0000 0.0000
0.0001 0.9993 0.0001 0.0005
0.0000 1.0000 0.0000 0.0000
0.0000 1.0000 0.0000 0.0000
0.0004 0.9987 0.0009 0.0001
0.0008 0.9684 0.0093 0.0215
0.0002 0.9935 0.0048 0.0014
0.0000 0.9962 0.0010 0.0028
0.0000 0.9999 0.0000 0.0001
0.0000 0.9999 0.0000 0.0001
0.0000 0.9998 0.0000 0.0002
0.0001 0.9992 0.0000 0.0007
0.0001 0.9997 0.0000 0.0002
0.0024 0.9967 0.0003 0.0006
0.0000 0.9999 0.0000 0.0000
0.0047 0.9947 0.0006 0.0001
0.0000 0.8769 0.0004 0.1226
0.0000 0.9977 0.0000 0.0023
0.0000 0.9052 0.0946 0.0002
0.0000 0.3610 0.6390 0.0001
0.0000 0.9968 0.0027 0.0005
0.0001 0.9996 0.0000 0.0002
0.0000 0.9999 0.0000 0.0001
0.0000 0.9999 0.0000 0.0001
0.0000 1.0000 0.0000 0.0000
0.0000 0.0102 0.9898 0.0000
0.0000 0.0052 0.9948 0.0000
0.0001 0.0148 0.9317 0.0534
0.0000 0.2009 0.7979 0.0012
0.0000 0.0454 0.9535 0.0011
0.0000 0.0134 0.9859 0.0007
0.0000 0.0135 0.9864 0.0001
0.0000 0.0018 0.9980 0.0001
0.0000 0.0014 0.9986 0.0000
0.0004 0.0027 0.9961 0.0008
0.0000 0.0031 0.9969 0.0000
0.0000 0.0011 0.9989 0.0000
0.0043 0.0071 0.9877 0.0009
0.0002 0.0127 0.9850 0.0021
0.0189 0.0044 0.9764 0.0004
0.0000 0.0060 0.9940 0.0000
0.0001 0.5613 0.4387 0.0000
0.0001 0.0085 0.9878 0.0035
0.0000 0.0036 0.9858 0.0106
0.0000 0.0039 0.9918 0.0043
0.0000 0.0195 0.9343 0.0462
0.0000 0.0083 0.9910 0.0007
0.0000 0.0001 0.9998 0.0000
0.0001 0.0002 0.9996 0.0001
0.0001 0.0038 0.9957 0.0004
0.0000 0.0002 0.9998 0.0000
0.0001 0.0162 0.9834 0.0004
0.0000 0.0013 0.9984 0.0003
0.0000 0.0007 0.9991 0.0002
0.0000 0.0003 0.9948 0.0049
0.0035 0.0153 0.4006 0.5806
0.0000 0.0019 0.9956 0.0024
0.0000 0.0079 0.6124 0.3797
0.0000 0.0006 0.9574 0.0421
0.0000 0.2833 0.7119 0.0048
0.0000 0.0047 0.9928 0.0025
0.0000 0.9853 0.0117 0.0030
0.0001 0.0065 0.9925 0.0009
0.0049 0.0308 0.9612 0.0031
0.0000 0.0002 0.9990 0.0008
0.0001 0.0024 0.9854 0.0120
0.0000 0.0205 0.9794 0.0001
0.0000 0.0077 0.9706 0.0217
0.0000 0.0153 0.9645 0.0201
0.0000 0.0000 0.9972 0.0028
0.0001 0.0003 0.9995 0.0001
0.0003 0.0004 0.9990 0.0003
0.0000 0.0000 1.0000 0.0000
0.0000 0.0974 0.8664 0.0362
0.0354 0.0898 0.8506 0.0242
0.0014 0.0286 0.9435 0.0265
0.0000 0.0023 0.9630 0.0348
0.0000 0.0035 0.9950 0.0015
0.0003 0.1651 0.5656 0.2690
0.0000 0.0602 0.9390 0.0008
0.0011 0.0227 0.9641 0.0121
0.0001 0.0187 0.9703 0.0109
0.0001 0.0040 0.9953 0.0005
0.0016 0.0364 0.9560 0.0060
0.0000 0.0001 0.9997 0.0002
0.0021 0.5074 0.3676 0.1229
0.0000 0.0047 0.9898 0.0056
0.0000 0.0012 0.9987 0.0001
0.0002 0.0240 0.9757 0.0001
0.0001 0.0016 0.9981 0.0002
0.0030 0.0037 0.9876 0.0057
0.0003 0.0002 0.9992 0.0003
0.0006 0.0000 0.9988 0.0006
0.0000 0.0001 0.9996 0.0004
0.0000 0.0012 0.9937 0.0051
0.0003 0.0995 0.8957 0.0044
0.0000 0.0047 0.9678 0.0275
0.0000 0.0004 0.9960 0.0036
0.0002 0.0001 0.9924 0.0073
0.0013 0.0017 0.9969 0.0000
0.0000 0.0001 0.9992 0.0007
0.0000 0.0003 0.9986 0.0011
0.0006 0.0021 0.9886 0.0088
0.0001 0.1102 0.5884 0.3013
0.0000 0.0012 0.9985 0.0003
0.0001 0.0065 0.9924 0.0011
0.0000 0.0571 0.9425 0.0003
0.0000 0.0067 0.9468 0.0464
0.0000 0.0081 0.9910 0.0009
0.0000 0.0013 0.9985 0.0002
0.0000 0.0045 0.9945 0.0010
0.0002 0.1252 0.8727 0.0018
0.0000 0.0001 0.9999 0.0000
0.0000 0.0001 0.9999 0.0000
0.0000 0.0144 0.9850 0.0005
0.0000 0.0079 0.9919 0.0002
0.0000 0.0052 0.9917 0.0031
0.0000 0.0067 0.9930 0.0003
0.0000 0.0160 0.9628 0.0212
0.0000 0.0002 0.9987 0.0010
0.0000 0.0368 0.9631 0.0001
0.0000 0.1215 0.8766 0.0019
0.0000 0.0152 0.9825 0.0023
0.0000 0.0002 0.9995 0.0002
0.0000 0.0231 0.9759 0.0010
0.0000 0.0007 0.9669 0.0324
0.0000 0.0002 0.9998 0.0000
0.0000 0.0008 0.9991 0.0000
0.0000 0.0011 0.9983 0.0006
0.0001 0.0007 0.9973 0.0019
0.0015 0.0513 0.9444 0.0028
0.0000 0.0010 0.9990 0.0000
0.0000 0.0018 0.8347 0.1634
0.0001 0.0002 0.9997 0.0001
0.0000 0.0044 0.9934 0.0021
0.0000 0.0000 0.9999 0.0001
0.0000 0.1064 0.8682 0.0254
0.0001 0.0094 0.9830 0.0075
0.0002 0.1151 0.5625 0.3222
0.0004 0.0011 0.9949 0.0036
0.0007 0.0029 0.9658 0.0306
0.0000 0.0008 0.9985 0.0007
0.0001 0.0060 0.9890 0.0049
0.0667 0.0656 0.8655 0.0022
0.0000 0.0023 0.9963 0.0013
0.0001 0.0018 0.9977 0.0004
0.0000 0.0904 0.8711 0.0385
0.0001 0.0051 0.9939 0.0009
0.0000 0.0087 0.9793 0.0120
0.0000 0.0011 0.9982 0.0007
0.0000 0.0078 0.9884 0.0038
0.0009 0.0059 0.9930 0.0003
0.0001 0.0061 0.3670 0.6269
0.0000 0.0001 0.9998 0.0002
0.0002 0.0253 0.9639 0.0107
0.0000 0.0006 0.9981 0.0012
0.0000 0.0375 0.9614 0.0011
0.0000 0.0000 0.9999 0.0001
0.0000 0.0010 0.9989 0.0001
0.0000 0.0000 0.9999 0.0001
0.0009 0.0234 0.9752 0.0005
0.0000 0.0002 0.9963 0.0035
0.0000 0.0002 0.9997 0.0001
0.0000 0.0043 0.9957 0.0000
0.0004 0.0311 0.9678 0.0007
0.0000 0.0078 0.9921 0.0002
0.0001 0.0016 0.9975 0.0008
0.0000 0.0001 0.9932 0.0067
0.0000 0.0035 0.9961 0.0003
0.0000 0.0006 0.9994 0.0000
0.0000 0.0274 0.9646 0.0080
0.0000 0.0041 0.9951 0.0007
0.0000 0.0020 0.4889 0.5091
0.0000 0.0003 0.9933 0.0064
0.0001 0.0093 0.9902 0.0004
0.0007 0.0977 0.9015 0.0001
0.0003 0.0065 0.9928 0.0004
0.0000 0.0082 0.9916 0.0001
0.0000 0.0030 0.9970 0.0000
0.0000 0.0006 0.9993 0.0000
0.0001 0.0045 0.9949 0.0006
0.0000 0.0019 0.9730 0.0250
0.0083 0.0926 0.8989 0.0002
0.0048 0.2440 0.7495 0.0017
0.0049 0.0123 0.9757 0.0071
0.0000 0.0101 0.9464 0.0435
0.0000 0.0021 0.9978 0.0001
0.0005 0.5096 0.4724 0.0174
0.0009 0.0336 0.9637 0.0019
0.0001 0.0064 0.9917 0.0018
0.0001 0.0103 0.9847 0.0049
0.0010 0.0020 0.9967 0.0004
0.0000 0.0052 0.9906 0.0042
0.0000 0.0683 0.9124 0.0193
0.0000 0.0008 0.9978 0.0015
0.0001 0.4198 0.5787 0.0013
0.0021 0.0098 0.9851 0.0031
0.0049 0.0032 0.9913 0.0007
0.0017 0.0004 0.9973 0.0006
0.0000 0.0012 0.9988 0.0000
0.0005 0.0106 0.9888 0.0001
0.0001 0.0051 0.9946 0.0001
0.0011 0.0021 0.9898 0.0069
0.0001 0.0013 0.9973 0.0013
0.0000 0.0406 0.9574 0.0019
0.0000 0.1257 0.8723 0.0020
0.0001 0.0025 0.9974 0.0000
0.0007 0.0245 0.9743 0.0006
0.0016 0.0005 0.9961 0.0018
0.0000 0.0033 0.9967 0.0000
0.0000 0.0066 0.9933 0.0002
0.0010 0.0001 0.9989 0.0000
0.0006 0.0004 0.9864 0.0125
0.0000 0.0001 0.9999 0.0000
0.0001 0.0002 0.9997 0.0000
0.0001 0.0050 0.9940 0.0010
0.0003 0.0762 0.9231 0.0003
0.0000 0.0000 0.9820 0.0179
0.0000 0.0006 0.9994 0.0000
[truncated: 3,327 more rows]

## Sheet: confusion matrices
										for CD											for SIC
										Accuracy:	99.9736										Accuracy:		99.9736
True	Celiac Disease	1458	0				TP	FN		Precision:	99.9315			true/expected							Precision:		100
	Small Intestine Control	1	2328				FP	TN		Recall/Sensitivity/TPR:	100			SIC	CD						Recall/Sensitivity/TPR:		99.9571
		Celiac Disease	Small Intestine Control							F1-Score:	99.9657	predicted	SIC	2328	0			TP	FP		F1-Score:		99.9785
		Predicted								Specificity:	99.9571		CD	1	1458			FN	TN		Specificity:		100
										FPR:	0.0429369										FPR:		0
										true/expected				for celiac disease			Accuracy:	99.6787						for duodenal inflammation
True	Celiac Disease	1453	7	3						CD	DI	SIC					Precision:	99.5888						true/expected
	Duodenal Inflammation	2	1151	37				predicted	CD	1453	2	4		1453	6		Recall/Sensitivity/TPR:	99.3165					predicted	1151	42
	Small Intestine Control	4	35	2288					DI	7	1151	35		10	3511		F1-Score:	99.4524						39	3748
		Celiac Disease	Duodenal Inflammation	Small Intestine Control					SIC	3	37	2288					Specificity:	99.8294
		Predicted															FPR:	0.1706					for DI
														TP	FP								Accuracy:	98.3735
														FN	TN				true/expected				Precision:	96.4795
																			DI	CD	SIC		Recall/Sensitivity/TPR:		96.7227
True	Celiac Disease	1455	0	7	7											predicted	DI		1151	7	35		F1-Score:	96.6009
	Duodenal Adenocarcinoma	1	638	38	2												CD		2	1453	4		Specificity:	98.8918
	Duodenal Inflammation	0	93	1122	41												SIC		37	3	2288		FPR:	1.10818
	Small Intestine Control	3	14	26	2278
		Celiac Disease	Duodenal Adenocarcinoma	Duodenal Inflammation	Small Intestine Control													true/expected
		Predicted																SIC	DI	CD			for SIC
																predicted	SIC	2288	37	3			true/expected
																	DI	35	1151	7		predicted	2288	40		TP	FP
																	CD	4	2	1453			39	2613		FN	TN
																							for SIC
																							Accuracy:	98.4137
																							Precision:	98.2818
																							Recall/Sensitivity/TPR:		98.324
																							F1-Score:	98.3029
																							Specificity:	98.4923
																							FPR:	1.50773
							true/expected
							Celiac Disease	Duodenal Adenocarcinoma	Duodenal Inflammation	Small Intestine Control		for CD
					predicted	Celiac Disease	1455	1	0	3			1455	4		for CD
						Duodenal Adenocarcinoma	0	638	93	14			14	4252		Accuracy:		99.6856
						Duodenal Inflammation	7	38	1122	26						Precision:		99.7258
						Small Intestine Control	7	2	41	2278			TP	FP		Recall/Sensitivity/TPR:		99.047
													FN	TN		F1-Score:		99.3852
																Specificity:		99.906
																FPR:		0.093985
								true/expected
								Duodenal Adenocarcinoma	Celiac Disease	Duodenal Inflammation	Small Intestine Control		for DUOADEK			for DUODADK
					predicted	Duodenal Adenocarcinoma		638	0	93	14		638	107		Accuracy:		97.4148
						Celiac Disease		1	1455	0	3		41	4939		Precision:		85.6376
						Duodenal Inflammation		38	7	1122	26					Recall/Sensitivity/TPR:		93.9617
						Small Intestine Control		2	7	41	2278		TP	FP		F1-Score:		89.6067
													FN	TN		Specificity:		97.8795
																FPR:		2.12049
								true/expected
								Duodenal Inflammation	Duodenal Adenocarcinoma	Celiac Disease	Small Intestine Control		for DUOINFLA			for DUO INFLA
					predicted	Duodenal Inflammation		1122	38	7	26		1122	71		Accuracy:		96.4192
						Duodenal Adenocarcinoma		93	638	0	14		134	4398		Precision:		94.0486
						Celiac Disease		0	1	1455	3					Recall/Sensitivity/TPR:		89.3312
						Small Intestine Control		41	2	7	2278		TP	FP		F1-Score:		91.6292
													FN	TN		Specificity:		98.4113
																FPR:		1.58872
								true/expected
								Small Intestine Control	Duodenal Inflammation	Duodenal Adenocarcinoma	Celiac Disease		for SIC			for SIC
					predicted	Small Intestine Control		2278	41	2	7		2278	50		Accuracy:		98.3755
						Duodenal Inflammation		26	1122	38	7		43	3354		Precision:		97.8522
						Duodenal Adenocarcinoma		14	93	638	0					Recall/Sensitivity/TPR:		98.1474
						Celiac Disease		3	0	1	1455		TP	FP		F1-Score:		97.9996
													FN	TN		Specificity:		98.5311
																FPR:		1.46886
